# Supplementary material for: Effects of dietary antioxidant vitamins on lung functions according to gender and smoking status in Korea: a population-based cross-sectional study
Source: PubMed Central journal article supplement — BMJ Open. 2018 Apr 7;8(4):e020656. doi: 10.1136/bmjopen-2017-020656 (PMC5892775; doi:10.1136/bmjopen-2017-020656), 2018-04-07
Supplement: bmjopen-2017-020656.draft_revisions.pdf [file bmjopen-2017-020656.draft_revisions.pdf]

# BMJ Open

BMJ Open is committed to open peer review. As part of this commitment we make the peer review history of every article we publish publicly available.

When an article is published we post the peer reviewers' comments and the authors' responses online. We also post the versions of the paper that were used during peer review. These are the versions that the peer review comments apply to.

The versions of the paper that follow are the versions that were submitted during the peer review process. They are not the versions of record or the final published versions. They should not be cited or distributed as the published version of this manuscript.

BMJ Open is an open access journal and the full, final, typeset and author-corrected version of record of the manuscript is available on our site with no access controls, subscription charges or pay-per-view fees (<http://bmjopen.bmj.com>).

If you have any questions on BMJ Open's open peer review process please email [info.bmjopen@bmj.com](mailto:info.bmjopen@bmj.com)

# BMJ Open

## Effects of dietary antioxidant vitamins on lung functions according to gender and smoking status: KNHANES 2007–2014

|                                 |                                                                                                                                                                                                                                                                                                                                                                                                                                       |
|---------------------------------|---------------------------------------------------------------------------------------------------------------------------------------------------------------------------------------------------------------------------------------------------------------------------------------------------------------------------------------------------------------------------------------------------------------------------------------|
| Journal:                        | <i>BMJ Open</i>                                                                                                                                                                                                                                                                                                                                                                                                                       |
| Manuscript ID                   | bmjopen-2017-020656                                                                                                                                                                                                                                                                                                                                                                                                                   |
| Article Type:                   | Research                                                                                                                                                                                                                                                                                                                                                                                                                              |
| Date Submitted by the Author:   | 15-Nov-2017                                                                                                                                                                                                                                                                                                                                                                                                                           |
| Complete List of Authors:       | Hong, Ji Young; Chuncheon Sacred Heart Hospital, Lee, Chang Youl; Chuncheon Sacred Heart Hospital, Hallym University Medical Center, Division of Pulmonary and Critical Care Medicine, Department of Medicine<br>Lee, Myung Goo; Chuncheon Sacred Heart Hospital, Hallym University Medical Center, Division of Pulmonary and Critical Care Medicine, Department of Medicine<br>Kim, Young Sam; Yonsei University College of Medicine |
| <b>Primary Subject Heading</b>: | Respiratory medicine                                                                                                                                                                                                                                                                                                                                                                                                                  |
| Secondary Subject Heading:      | Nutrition and metabolism                                                                                                                                                                                                                                                                                                                                                                                                              |
| Keywords:                       | lung function, gender, smoking, antioxidant vitamins                                                                                                                                                                                                                                                                                                                                                                                  |
|                                 |                                                                                                                                                                                                                                                                                                                                                                                                                                       |

SCHOLARONE™  
Manuscripts

1  
2  
3  
4 **1 Effects of dietary antioxidant vitamins on lung functions**  
5  
6  
7 **2 according to gender and smoking status: KNHANES 2007–2014**  
8  
9  
10  
11  
12  
13

14 Ji Young Hong, MD, PhD<sup>1,2</sup>, Chang Youl Lee, MD, PhD<sup>1,2</sup>, Myung Goo Lee, MD, PhD<sup>1,2</sup>,  
15  
16 Young Sam Kim, MD, PhD<sup>3</sup>  
17  
18  
19  
20  
21

22 1. Division of Pulmonary and Critical Care Medicine, Department of Medicine, Chuncheon Sacred  
23 Heart Hospital, Hallym University Medical Center, Chuncheon, Gangwon-do, Republic of Korea.  
24  
25

26 2. Lung Research Institute of Hallym University College of Medicine  
27

28 3. Division of Pulmonology, Department of Internal Medicine, Yonsei University College of  
29 Medicine, 50 Yonseiro, Seodaemun-gu, Seoul 120-752, Republic of Korea  
30  
31  
32

33  
34  
35  
36 **Corresponding Author:**

37 Young Sam Kim, M.D., Ph.D.

38 Professor

39 Division of Pulmonology, Department of Internal Medicine

40 Yonsei University College of Medicine

41 50 Yonseiro, Seodaemun-gu, Seoul 120-752, Republic of Korea

42  
43  
44  
45  
46  
47  
48  
49 Tel: 82-2-2228-1955, Fax: 82-2-393-6884 E-mail: [ysamkim@yuhs.ac](mailto:ysamkim@yuhs.ac)  
50  
51  
52  
53  
54  
55  
56  
57  
58  
59  
60

1  
2  
3  
4 **Abstract**  
5  
6

7  
8 **Objective:** Cigarette smoke-induced oxidative stress plays an important role in the pathogenesis of  
9  
10 chronic obstructive pulmonary disease (COPD). Dietary antioxidants are thought to prevent smoke-  
11  
12 induced oxidative damage. The aim of this study was to investigate associations between lung  
13  
14 function and the consumption of antioxidant vitamins in Korean adults.  
15

16  
17 **Methods:** In total, 21,148 participants from the Korean National Health and Nutrition Examination  
18  
19 Survey (2007–2014) were divided into four groups based on smoking history and gender. Multivariate  
20  
21 regression models were used to evaluate associations between lung function and intake of dietary  
22  
23 antioxidants.  
24

25  
26 **Results:** Subjects in the highest-intake quintile (Q5) of vitamin A, carotene, and vitamin C intake had  
27  
28 mean forced expiratory volume in 1 second (FEV<sub>1</sub>) measurements that were 25 ml, 27 ml, and 36 ml  
29  
30 higher than those of individuals in the lowest-intake quintile (Q1), respectively (*P* for trend; *P*=0.032,  
31  
32 *P*=0.038, and *P*=0.004, respectively). The risks of COPD for male smokers in Q1 increased 5.42-fold  
33  
34 (95% CI=4.09–7.18), 5.27-fold (95% CI=3.98–6.98), and 5.61-fold (4.26–7.39) for vitamin A,  
35  
36 carotene, and vitamin C, respectively, compared to those of female non-smokers in Q5. Among COPD  
37  
38 patients, males who smoked >20 pack years had mean FEV<sub>1</sub> measurements that were 124 ml, 94 ml,  
39  
40 and 113 ml higher than those of patients in Q1 (*P* for trend; *P*=0.018, *P*=0.026, and *P*=0.047, for  
41  
42 vitamin A, carotene, and vitamin C, respectively).  
43  
44

45 **Conclusions:** These findings indicate that the influence of antioxidant vitamins on lung function  
46  
47 depends on gender and smoking status in the Korean COPD population.  
48  
49

50  
51  
52  
53 Keywords: lung function, gender, smoking, antioxidant vitamins  
54  
55  
56  
57  
58  
59  
60

1  
2  
3  
4  
5  
6  
7  
8  
9  
10  
11  
12  
13  
14  
15  
16  
17  
18  
19  
20  
21  
22  
23  
24  
25  
26  
27  
28  
29  
30  
31  
32  
33  
34  
35  
36  
37  
38  
39  
40  
41  
42  
43  
44  
45  
46  
47  
48  
49  
50  
51  
52  
53  
54  
55  
56  
57  
58  
59  
60

1 **Strengths and limitation of this study**

- 2 ■ This study revealed that the influence of antioxidant vitamins on lung function depends on
- 3 gender and smoking status in Korean patients with COPD.
  
- 4 ■ A cross-sectional study with a large sample size collected from a national health survey
  
- 5 ■ Main limitations include a possible recall bias and no further verification of nutritional intake.

For peer review only

## 1 Introduction

2  
3  
4  
5  
6  
7  
8  
9  
10  
11  
12  
13  
14  
15  
16  
17  
18  
19  
20  
21  
22  
23  
24  
25  
26  
27  
28  
29  
30  
31  
32  
33  
34  
35  
36  
37  
38  
39  
40  
41  
42  
43  
44  
45  
46  
47  
48  
49  
50  
51  
52  
53  
54  
55  
56  
57  
58  
59  
60

Chronic obstructive pulmonary disease (COPD) causes morbidity and mortality<sup>1</sup>. Smoking is a primary risk factor for COPD; however, other factors also contribute as only 10–20% of smokers develop airflow limitations<sup>2</sup>.

Dietary antioxidants protect against oxidative stress caused by smoking<sup>3</sup>, and multiple studies have revealed associations between the intake of antioxidant vitamins or fibers and respiratory diseases<sup>4-8</sup>. However, evidence supporting the benefits of vitamin supplement therapy is lacking<sup>9-11</sup>.

Because micronutrient status is affected by dietary intake and metabolic turnover, which are regulated by oxidative stress, the benefits of antioxidant vitamins may vary by gender and smoking status. Multiple studies have shown that different antioxidants exhibit different effects based on smoking status. Morabia *et al.* reported an association between airway obstruction and vitamin A intake in smokers compared to former smokers, whereas Hu *et al.* reported that carotene was less strongly associated with FEV<sub>1</sub> in smokers compared to former smokers and non-smokers<sup>12 13</sup>.

This study used KNHANES data to investigate whether dietary antioxidant vitamins were independently associated with pulmonary function and COPD in the Korean population. This study also evaluated whether the effects of antioxidant vitamins on pulmonary function differed based on gender or smoking status.

## 1 **Patients and Methods**

### 3 *Study population*

4 Participants were sampled from Korean National Health and Nutritional Examination Survey  
5 (KNHANES; 2007–2014) IV–VI, a nationwide survey designed to be representative of the population  
6 that is used to establish health policies. KNHANES contains a massive database with information  
7 about demographic characteristics, comorbidities, lung function, nutritional status, and health  
8 (<https://knhanes.cdc.go.kr/knhanes>).

9 A two-stage stratified systemic sampling method was use to select 65,973 individuals to survey  
10 between February 2007 and December 2014. Of the chosen individuals, 34,278 participants over 40  
11 years of age responded to questionnaires regarding diet and smoking history and underwent a medical  
12 examination. After excluding subjects who omitted lung function or nutrition data, we analyzed data  
13 from 21,148 (8,804 men and 12,344 women) in this study. This study was approved by the  
14 Institutional Review Board of the Korean Centers for Disease Control and Prevention. All participants  
15 provided informed written consent.

### 17 *Spirometry and airflow obstruction definitions*

18 The pulmonary function test (PFT) was performed using dry-rolling seal volume spirometers (Model  
19 2130; SensorMedics, Yorba Linda, CA, USA) and standardized according to the American Thoracic  
20 Society/European Respiratory Society criteria<sup>14</sup>. Qualified technicians and principal investigators  
21 assessed the spirometry data for acceptability and reproducibility. The predictive equations for the  
22 forced expiratory volume in 1 second (FEV<sub>1</sub>) and the forced vital capacity (FVC) were derived from  
23 survey data on non-smokers who had normal chest X-rays and no previous history of respiratory  
24 diseases<sup>15</sup>. COPD was defined as a FEV<sub>1</sub>/FVC <70 %<sup>16</sup>.

### 1 *Dietary assessments*

2 Food intake data were obtained using the 24-h recall method, in which participants were asked to  
3 report the foods and amounts thereof consumed during the previous 24 hours. Total energy (kJ/d  
4 (kcal/d)) and total intake of antioxidant vitamins were calculated using the Korean Food Composition  
5 Table<sup>17</sup> as the reference. Antioxidant vitamin consumption was adjusted for total energy intake.

### 6 7 *Potential confounders*

8 Data regarding demographic information, education level, household income, smoking status,  
9 smoking amount, alcohol intake, body mass index (BMI), and comorbid diseases were obtained.  
10 Educational level was categorized as elementary school or lower, completion of middle school,  
11 completion of high school, and college or higher. Household income was divided by quartile.

12 Smokers were subjects who smoked more than 100 cigarettes in their lifetime. Participants were  
13 categorized in terms of smoking status as follows: smoker, ex-smoker, or never smoked. The smoking  
14 amount was determined in pack years, which was calculated by multiplying the duration of smoking  
15 (years) by the number of packs of cigarettes smoked. Comorbid diseases included hypertension,  
16 stroke, cardiovascular disease, arthritis, tuberculosis, asthma, diabetes mellitus, thyroid disorders,  
17 renal failure, liver disease, and malignancy.

### 18 19 *Statistical analysis*

20 The relationship between antioxidant vitamin intake and lung function was analyzed using multiple  
21 linear regression analyses. We analyzed the energy-adjusted antioxidant vitamin intake by quintiles.  
22 The adjustment factors were age, sex, BMI, educational level, household income, total energy intake,  
23 number of comorbid diseases, smoking history, alcohol intake, and pack years<sup>4 12 18</sup>. Assessments of  
24 linear trends across increasing antioxidant vitamin quintiles were also performed.

25 We estimated the odds ratios (ORs) of COPD using multivariate logistic regression analyses of  
26 quintiles after adjusting for confounding factors. Participants were divided into four groups based on



1  
2  
3  
4  
5  
6  
7  
8  
9  
10  
11  
12  
13  
14  
15  
16  
17  
18  
19  
20  
21  
22  
23  
24  
25  
26  
27  
28  
29  
30  
31  
32  
33  
34  
35  
36  
37  
38  
39  
40  
41  
42  
43  
44  
45  
46  
47  
48  
49  
50  
51  
52  
53  
54  
55  
56  
57  
58  
59  
60

1 gender and smoking status (male smokers, male non-smokers, female smokers, female non-smokers).  
2 For combined analyses between the effects of antioxidant vitamin intake, gender, and smoking status  
3 on the risk of COPD, interaction tests were performed. Multiple linear regression analyses were  
4 performed after categorizing COPD patients by smoking status and amount.  
5 Statistical analyses were performed using PASW Statistics ver. 20 (SPSS Inc., Chicago IL, USA) and  
6 SAS ver. 9.4 (SAS Institute, Cary, NC, USA) software. *P*-values <0.05 were considered statistically  
7 significant.

For peer review only

## 1 Results

2  
3 The baseline characteristics of the 21,148 participants are shown in Table 1. All subjects were  
4 classified into four groups based on smoking history and gender. Of the 7,986 smokers, 7,178 were  
5 male (mean age, 57.8±11.0 years) and 808 were female (mean age, 57.4±12.5 years). Of the 13,162  
6 individuals who had never smoked, 1,626 were male (mean age, 57.9±11.3 years) and 11,536 were  
7 female (mean age, 57.1±10.8 years). Among all subjects, 3,005 were diagnosed with COPD. The  
8 prevalence of COPD was highest in male smokers (26.4%) and lowest in female non-smokers (6.4%).  
9 The four groups differed regarding age, BMI, educational level, household income, and alcohol usage  
10 ( $P<0.001$ ). Energy intake was significantly higher in males than females (males, 2,256.5 kcal; females,  
11 1,648.3 kcal;  $P<0.001$ ). The levels of vitamin A, carotene, and vitamin C were highest in the male  
12 non-smoker group and lowest in the female smoker group.

13 A statistically significant dose–response relationship was observed between lung function (FEV<sub>1</sub>,  
14 FVC) and dietary antioxidant vitamin levels (Table 2). Participants in the highest quintile (Q5) of  
15 vitamin A intake had 25 ml higher FEV<sub>1</sub> ( $P$  for trend across quintiles = 0.032) and 31 ml higher FVC  
16 ( $P$  for trend across quintiles = 0.013) compared to participants in the lowest quintile (Q1). Participants  
17 in Q5 for carotene intake had 27 ml higher FEV<sub>1</sub> ( $P$  for trend across quintiles = 0.038) and 34 ml  
18 higher FVC ( $P$  for trend across quintiles = 0.011) measurements compared to participants in Q1.  
19 Participants in Q5 of vitamin C intake had 36 ml higher FEV<sub>1</sub> ( $P$  for trend across quintiles = 0.004)  
20 and 35 ml higher FVC ( $P$  for trend across quintiles = 0.027) measurements compared to participants  
21 in Q1.

22 The effects of gender, smoking, and dietary antioxidant vitamins on the risk of COPD are summarized  
23 in Table 3. The risk of COPD for male smokers in Q1 for vitamin A, carotene, and vitamin C intake  
24 increased by 5.42-fold (95% CI=4.09–7.18), 5.27-fold (95% CI=3.98–6.98), and 5.61-fold (95%  
25 CI=4.26–7.39), respectively, which was greater than that observed for female non-smokers in Q5 for  
26 antioxidant vitamin intake. The interaction effect was significant (all  $P$ -values <0.001).

1  
2  
3  
4 1 According to the multivariate logistic regression analyses, the risk of COPD was influenced by dietary  
5  
6 2 antioxidant vitamin levels in male smokers (Figure 1). In male smokers, the risk of COPD in subjects  
7  
8 3 in Q5 for vitamin A and vitamin C intake was significantly lower than that for subjects in Q1 (vitamin  
9  
10 4 A, OR = 0.77, 95% CI = 0.63–0.94,  $P = 0.011$ ; vitamin C, OR = 0.76, 95% CI = 0.62–0.93,  $P =$   
11  
12 5 0.007). Similarly, the prevalence of COPD was lower in Q5 compared to Q1 for carotene; however,  
13  
14 6 this trend was not significant (OR = 0.82, 95% CI = 0.67–1.00,  $P=0.052$ ). The prevalence of COPD  
15  
16 7 did not increase significantly as the intake of dietary antioxidant vitamins increased in male non-  
17  
18 8 smokers, female smokers, or female non-smokers. No significant interaction between the effects of  
19  
20 9 antioxidant vitamins on COPD and smoking status was observed. The correlation between the risk of  
21  
22 10 COPD and antioxidant vitamin intake was stronger in male smokers who smoked less than 20 pack  
23  
24 11 years (not shown).

25  
26  
27  
28  
29 12 We investigated the association between dietary antioxidant vitamin intake and lung function after  
30  
31 13 limiting the analyses to individuals with COPD. The changes in FEV<sub>1</sub> were not statistically significant  
32  
33 14 based on the levels of dietary antioxidant vitamins in subjects with COPD. Interestingly, only male  
34  
35 15 smokers exhibited a beneficial association between dietary antioxidant vitamin intake and FEV<sub>1</sub>  
36  
37 16 (Table 4). Male smokers with COPD in Q5 for vitamin A intake had a 66-ml higher FEV<sub>1</sub> ( $P$  for trend  
38  
39 17 across quintiles = 0.024) compared to those in Q1. Male smokers with COPD in Q5 of carotene and  
40  
41 18 vitamin C intake had 65-ml higher FEV<sub>1</sub> ( $P$  for trend across quintiles = 0.046) and a 101-ml higher  
42  
43 19 FEV<sub>1</sub> ( $P$  for trend across quintiles = 0.039), respectively, compared to individuals in Q1.

44  
45  
46 20 Male COPD patients who had smoked  $\geq 20$  pack years exhibited a beneficial association between  
47  
48 21 dietary antioxidant vitamin intake and FEV<sub>1</sub> (Figure 2). Male COPD patients in Q5 of vitamin A  
49  
50 22 intake who had smoked  $\geq 20$  pack years had a 124-ml higher FEV<sub>1</sub> ( $P$  for trend across quintiles =  
51  
52 23 0.018) compared to individuals in Q1. COPD patients in Q5 of carotene intake who had smoked  $\geq 20$   
53  
54 24 pack years had a 94-ml higher FEV<sub>1</sub> ( $P$  for trend across quintiles = 0.026) compared with patients in  
55  
56  
57  
58  
59  
60

1  
2  
3  
4  
5  
6  
7  
8  
9  
10  
11  
12  
13  
14  
15  
16  
17  
18  
19  
20  
21  
22  
23  
24  
25  
26  
27  
28  
29  
30  
31  
32  
33  
34  
35  
36  
37  
38  
39  
40  
41  
42  
43  
44  
45  
46  
47  
48  
49  
50  
51  
52  
53  
54  
55  
56  
57  
58  
59  
60

1 Q1. COPD patients in Q5 of vitamin C intake who had smoked >20 pack years had a 113-ml higher  
2 FEV<sub>1</sub> (*P* for trend across quintiles = 0.047) compared to patients in Q1.

3

4

5

6

7

8

9

10

11

12

13

14

15

16

17

18

19

20

21

22

23

24

25

26

For peer review only

## 1 Discussion

2  
3 This study examined the association between the intake of antioxidant vitamins and lung functions in  
4 the Korean population. Previous studies showed that antioxidant vitamins, including vitamin C, were  
5 protective of the human lung<sup>5,13</sup>, whereas high levels of vitamin A and carotene were also associated  
6 with increased lung functions in multiple studies<sup>12,19-23</sup>. In a randomized controlled trial, Keranis *et al.*  
7 reported that increasing the intake of antioxidants improved lung function<sup>24</sup>.

8 Cigarette smoking is the primary cause of COPD as it increases oxidative stress in the lungs and  
9 activates inflammatory responses<sup>25</sup>. Notably, one inhalation from a cigarette generates more than 10<sup>15</sup>  
10 free radicals and other oxidants<sup>26</sup>.

11 Antioxidants protect against the damage caused by smoking in multiple ways<sup>3</sup>. For example, as it is  
12 water-soluble, vitamin C scavenges free radicals in the cytoplasm. Koike *et al.* reported that vitamin C  
13 diminished smoke-induced oxidative stress and corrected emphysematous lungs *in vivo*<sup>27</sup>.

14 Carotenoids quench singlet oxygen and inhibit lipid peroxidation<sup>3</sup>. In an animal study, the respiratory  
15 epithelia of retinol-deficient animals had atrophied ciliated cells and modified lipid contents<sup>28</sup>. The  
16 pathologic features of the retinol-deficient animals were similar to those of human smokers<sup>29</sup>.

17 Smokers exhibit nicotine-induced reductions in intestinal absorption and elevated metabolic  
18 turnover<sup>30</sup>. The metabolism or destruction of antioxidant vitamins increases in inflammatory  
19 environments<sup>31-34</sup>, which suggests that smokers with COPD require larger amounts of antioxidant  
20 vitamins to achieve the same blood levels as non-smokers. A study by Sargeant found that vitamin C  
21 may modify the adverse effects of smoking and the risk of COPD in the European population<sup>35</sup>.  
22 Additionally, Shin *et al.* reported that Korean smokers with adequate vitamin C intake had acceptable  
23 pulmonary functions<sup>36</sup>. Additionally, Morabia *et al.* identified that airway obstruction was reduced by  
24 vitamin A in smokers<sup>12</sup>.

25 One notable finding in the current study was that the effects of antioxidant vitamin intake on lung

1 function were stronger among male smokers. Additionally, the association between the risk of COPD  
2 and antioxidant vitamin intake was clear for male but not female smokers. Male smokers with lower  
3 antioxidant vitamin intakes had increased ORs of COPD compared to female smokers. After limiting  
4 the analysis to subjects with COPD, a significant association between antioxidant vitamin intake and  
5 FEV<sub>1</sub> was observed in male smokers but not in other groups. This finding was similar to that of Joshi  
6 *et al.*, where changes in COPD risk and dietary vitamin C and vitamin E intake differed between  
7 males and females<sup>37</sup>.

8 It is not known how gender differences impact pulmonary functions based on antioxidant vitamin  
9 intake; however, animal studies have revealed gender differences in antioxidant vitamin requirements.  
10 Al Rejaie *et al.* reported gender-related differences in the protective roles of ascorbic acid against  
11 oxidative stress<sup>38</sup>, whereas Jiao *et al.* revealed gender differences in the regulation and expression of  
12 oxidative genes in mice<sup>39</sup>.

13 Studies detailing the effects of antioxidant vitamins on lung function in smokers and non-smokers are  
14 lacking<sup>5,23</sup>. In the US population, Britton *et al.* revealed that the relationship between vitamin C  
15 intake and FEV<sub>1</sub> was stronger in ex-smokers than non- or current smokers<sup>5</sup>. Shahar *et al.* reported a  
16 relationship between individuals in Q1 of vitamin A intake and airway obstruction among individuals  
17 who smoked >41 pack years<sup>23</sup>.

18 Among male COPD patients, those smoking ≥20 pack years had improved lung functions as  
19 antioxidant vitamin intake increased. These results support that associations between antioxidants and  
20 lung function may differ according to smoking status in COPD patients. However, it is unknown what  
21 causes such differences. One hypothesis is that the efficacy of antioxidant vitamins is proportional to  
22 the level of oxidant burden in COPD. Additional studies are required to determine whether the  
23 benefits of antioxidant vitamins depend on the smoking duration or dose in COPD patients.

24 This study has several limitations that should be noted. As we used a cross-sectional design, the data  
25 cannot be used to answer questions regarding causation. Additionally, because data on nutritional

1  
2  
3  
4  
5  
6  
7  
8  
9  
10  
11  
12  
13  
14  
15  
16  
17  
18  
19  
20  
21  
22  
23  
24  
25  
26  
27  
28  
29  
30  
31  
32  
33  
34  
35  
36  
37  
38  
39  
40  
41  
42  
43  
44  
45  
46  
47  
48  
49  
50  
51  
52  
53  
54  
55  
56  
57  
58  
59  
60

1 intake were obtained by 24-hour recall, inaccurate responses may have been offered. This study used  
2 the pre-bronchodilator FEV<sub>1</sub> for determining COPD; however, the definition of COPD is based on  
3 post-bronchodilator FEV<sub>1</sub><sup>16</sup>. This study failed to obtain data regarding air pollution or occupational  
4 exposure and, therefore, could not associate these variables with lung function; however, the strength  
5 of this study is that these data represent the Korean population.

## 6 **Conclusion**

7 This study supports that antioxidant vitamins have beneficial effects on pulmonary function in the  
8 Korean population. The data indicate that there is a stronger association between antioxidant vitamin  
9 intake and the risk of COPD in male smokers. The beneficial effects of antioxidant vitamins in COPD  
10 patients differed by gender and smoking status, and future investigations should determine the roles of  
11 dietary antioxidant vitamins in specific groups.

12

## 13 **Contributors**

14 JYH and YSK equally contributed to the conception and design of the research; YSK contributed to  
15 the design of the research; CYL contributed to the acquisition and analysis of the data; MGL and  
16 YSK contributed to the interpretation of the data; and JYH drafted the manuscript. All authors  
17 critically revised the manuscript, agree to be fully accountable for ensuring the integrity and accuracy  
18 of the work, and read and approved the final manuscript.

19

## 20 **Conflict of Interest Statement**

21 The authors declare no conflict of interest.

22

23

1  
2  
3  
4 **1 Funding**  
5

6  
7 2 This research was supported by the National Research Foundation of Korea Grant funded by  
8  
9 3 Korean Government (NRF 2017R1C1B5017879, NRF-2017M3A9E8033225).  
10  
11 4

12  
13  
14 **5 Competing interests**  
15

16 6 None declared  
17  
18 7

19  
20 **8 Provenance and peer review**  
21

22 9 Not commissioned; externally peer reviewed  
23  
24  
25 10

26  
27 **11 Data sharing statement**  
28

29 12 No additional data are available.  
30  
31  
32 13  
33  
34 14  
35  
36 15  
37  
38 16  
39  
40 17  
41  
42 18  
43  
44 19  
45  
46 20  
47  
48 21  
49  
50 22  
51  
52 23  
53  
54 24  
55  
56  
57  
58  
59  
60



1  
2  
3  
4 1  
5  
6 2 **References**  
7  
8 3  
9  
10  
11 4  
12  
13 5  
14  
15 6  
16  
17 7  
18  
19 8  
20  
21 9  
22  
23 10  
24  
25 11  
26  
27 12  
28  
29 13  
30  
31 14  
32  
33 15  
34  
35 16  
36  
37 17  
38  
39 18  
40  
41 19  
42  
43 20  
44  
45 21  
46  
47 22  
48  
49 23  
50  
51 24  
52  
53 25  
54  
55 26  
56  
57 27  
58  
59  
60

1. Viegi G, Pistelli F, Sherrill DL, et al. Definition, epidemiology and natural history of COPD. *The European respiratory journal* 2007;30(5):993-1013. doi: 10.1183/09031936.00082507
2. Capocaccia R, Verdecchia A, Micheli A, et al. Breast cancer incidence and prevalence estimated from survival and mortality. *Cancer Causes Control* 1990;1(1):23-9.
3. Northrop-Clewes CA, Thurnham DI. Monitoring micronutrients in cigarette smokers. *Clin Chim Acta* 2007;377(1-2):14-38. doi: 10.1016/j.cca.2006.08.028
4. Kan H, Stevens J, Heiss G, et al. Dietary fiber, lung function, and chronic obstructive pulmonary disease in the atherosclerosis risk in communities study. *Am J Epidemiol* 2008;167(5):570-8. doi: 10.1093/aje/kwm343
5. Britton JR, Pavord ID, Richards KA, et al. Dietary antioxidant vitamin intake and lung function in the general population. *Am J Respir Crit Care Med* 1995;151(5):1383-7. doi: 10.1164/ajrccm.151.5.7735589
6. Schunemann HJ, Freudenheim JL, Grant BJ. Epidemiologic evidence linking antioxidant vitamins to pulmonary function and airway obstruction. *Epidemiol Rev* 2001;23(2):248-67.
7. Kelly FJ. Vitamins and respiratory disease: antioxidant micronutrients in pulmonary health and disease. *Proc Nutr Soc* 2005;64(4):510-26.
8. Butler LM, Koh WP, Lee HP, et al. Dietary fiber and reduced cough with phlegm: a cohort study in Singapore. *American journal of respiratory and critical care medicine* 2004;170(3):279-87. doi: 10.1164/rccm.200306-789OC
9. Rautalahti M, Virtamo J, Haukka J, et al. The effect of alpha-tocopherol and beta-carotene supplementation on COPD symptoms. *American journal of respiratory and critical care medicine* 1997;156(5):1447-52. doi: 10.1164/ajrccm.156.5.96-11048
10. Wu TC, Huang YC, Hsu SY, et al. Vitamin E and vitamin C supplementation in patients

- 1  
2  
3  
4 1 with chronic obstructive pulmonary disease. *Int J Vitam Nutr Res* 2007;77(4):272-9. doi:  
5  
6 2 oi: 10.1024/0300-9831.77.4.272
- 7  
8 3 11. Heart Protection Study Collaborative G. MRC/BHF Heart Protection Study of antioxidant  
9  
10 4 vitamin supplementation in 20,536 high-risk individuals: a randomised placebo-controlle  
11  
12 5 d trial. *Lancet* 2002;360(9326):23-33. doi: 10.1016/S0140-6736(02)09328-5
- 13  
14 6 12. Morabia A, Sorenson A, Kumanyika SK, et al. Vitamin A, cigarette smoking, and airway  
15  
16 7 obstruction. *Am Rev Respir Dis* 1989;140(5):1312-6. doi: 10.1164/ajrccm/140.5.1312
- 17  
18 8 13. Hu G, Cassano PA. Antioxidant nutrients and pulmonary function: the Third National Hea  
19  
20 9 lth and Nutrition Examination Survey (NHANES III). *Am J Epidemiol* 2000;151(10):97  
21  
22 10 5-81.
- 23  
24 11 14. Miller MR, Hankinson J, Brusasco V, et al. Standardisation of spirometry. *The European*  
25  
26 12 *respiratory journal* 2005;26(2):319-38. doi: 10.1183/09031936.05.00034805
- 27  
28 13 15. Choi JK, Paek D, Lee JO. Normal Predictive Values of Spirometry in Korean Population.  
29  
30 14 *Tuberc Respir Dis* 2005;58(3):230-42. doi: 10.4046/trd.2005.58.3.230
- 31  
32 15 16. Rabe KF, Hurd S, Anzueto A, et al. Global strategy for the diagnosis, management, and  
33  
34 16 prevention of chronic obstructive pulmonary disease: GOLD executive summary. *Am J*  
35  
36 17 *Respir Crit Care Med* 2007;176(6):532-55. doi: 10.1164/rccm.200703-456SO
- 37  
38 18 17. RRD I. Food Composition Table. 7th ed. ed. Suwon,Korea: Rural Resource Development  
39  
40 19 Institute 2006.
- 41  
42 20 18. Hong JY, Kim SY, Chung KS, et al. Factors associated with the quality of life of Korea  
43  
44 21 n COPD patients as measured by the EQ-5D. *Qual Life Res* 2015;24(10):2549-58. doi:  
45  
46 22 10.1007/s11136-015-0979-6
- 47  
48 23 19. Kelly Y, Sacker A, Marmot M. Nutrition and respiratory health in adults: findings from t  
49  
50 24 he health survey for Scotland. *Eur Respir J* 2003;21(4):664-71.
- 51  
52 25 20. McKeever TM, Lewis SA, Smit HA, et al. A multivariate analysis of serum nutrient leve  
53  
54 26 ls and lung function. *Respir Res* 2008;9:67. doi: 10.1186/1465-9921-9-67
- 55  
56 27 21. Miedema I, Feskens EJ, Heederik D, et al. Dietary determinants of long-term incidence of

- 1  
2  
3  
4 1 chronic nonspecific lung diseases. The Zutphen Study. *Am J Epidemiol* 1993;138(1):3  
5  
6 2 7-45.  
7  
8 3 22. McKeever TM, Scrivener S, Broadfield E, et al. Prospective study of diet and decline in  
9  
10 4 lung function in a general population. *Am J Respir Crit Care Med* 2002;165(9):1299-3  
11  
12 5 03. doi: 10.1164/rccm.2109030  
13  
14 6 23. Shahar E, Folsom AR, Melnick SL, et al. Does dietary vitamin A protect against airway  
15  
16 7 obstruction? The Atherosclerosis Risk in Communities (ARIC) Study Investigators. *Am*  
17  
18 8 *J Respir Crit Care Med* 1994;150(4):978-82. doi: 10.1164/ajrccm.150.4.7921473  
19  
20 9 24. Keranis E, Makris D, Rodopoulou P, et al. Impact of dietary shift to higher-antioxidant f  
21  
22 10 oods in COPD: a randomised trial. *Eur Respir J* 2010;36(4):774-80. doi: 10.1183/0903  
23  
24 11 1936.00113809  
25  
26 12 25. Alberg AJ, Chen JC, Zhao H, et al. Household exposure to passive cigarette smoking and  
27  
28 13 serum micronutrient concentrations. *Am J Clin Nutr* 2000;72(6):1576-82.  
29  
30 14 26. Pryor WA, Stone K. Oxidants in cigarette smoke. Radicals, hydrogen peroxide, peroxy nitr  
31  
32 15 ate, and peroxy nitrite. *Ann N Y Acad Sci* 1993;686:12-27; discussion 27-8.  
33  
34 16 27. Koike K, Ishigami A, Sato Y, et al. Vitamin C prevents cigarette smoke-induced pulmona  
35  
36 17 ry emphysema in mice and provides pulmonary restoration. *American journal of respir*  
37  
38 18 *atory cell and molecular biology* 2014;50(2):347-57. doi: 10.1165/rcmb.2013-0121OC  
39  
40 19 28. Iakovleva OA, Pentiuk AA, Gutsol VI, et al. [Effect of vitamin A deficiency on surfactan  
41  
42 20 ts and enzymes of xenobiotic metabolism in the rat lung]. *Vopr Pitan* 1987(4):61-3.  
43  
44 21 29. Nettesheim P, Snyder C, Kim JC. Vitamin A and the susceptibility of respiratory tract tis  
45  
46 22 sues to carcinogenic insult. *Environ Health Perspect* 1979;29:89-93.  
47  
48 23 30. Kallner AB, Hartmann D, Hornig DH. On the requirements of ascorbic acid in man: stea  
49  
50 24 dy-state turnover and body pool in smokers. *Am J Clin Nutr* 1981;34(7):1347-55.  
51  
52 25 31. Lykkesfeldt J, Loft S, Nielsen JB, et al. Ascorbic acid and dehydroascorbic acid as biom  
53  
54 26 arketers of oxidative stress caused by smoking. *Am J Clin Nutr* 1997;65(4):959-63.  
55  
56 27 32. Cser MA, Majchrzak D, Rust P, et al. Serum carotenoid and retinol levels during childho  
57  
58  
59  
60

- 1  
2  
3  
4 1 od infections. *Ann Nutr Metab* 2004;48(3):156-62. doi: 10.1159/000078379
- 5  
6 2 33. Thurnham DI, McCabe GP, Northrop-Clewes CA, et al. Effects of subclinical infection on  
7  
8 3 plasma retinol concentrations and assessment of prevalence of vitamin A deficiency:  
9  
10 4 meta-analysis. *Lancet* 2003;362(9401):2052-8.
- 11  
12 5 34. Pelletier O. Smoking and vitamin C levels in humans. *Am J Clin Nutr* 1968;21(11):1259-  
13  
14 6 67.
- 15  
16 7 35. Sargeant LA, Jaeckel A, Wareham NJ. Interaction of vitamin C with the relation between  
17  
18 8 smoking and obstructive airways disease in EPIC Norfolk. European Prospective Inve  
19  
20 9 stigation into Cancer and Nutrition. *Eur Respir J* 2000;16(3):397-403.
- 21  
22 10 36. Shin JY, Shim JY, Lee DC, et al. Smokers With Adequate Vitamin C Intake Show a Pr  
23  
24 11 eferable Pulmonary Function Test. *J Am Coll Nutr* 2015;34(5):385-90. doi: 10.1080/07  
25  
26 12 315724.2014.926152
- 27  
28 13 37. Joshi P, Kim WJ, Lee SA. The effect of dietary antioxidant on the COPD risk: the com  
29  
30 14 munity-based KoGES (Ansan-Anseong) cohort. *Int J Chron Obstruct Pulmon Dis* 2015  
31  
32 15 ;10:2159-68. doi: 10.2147/COPD.S91877
- 33  
34 16 38. Al-Rejaie SS, Abuohashish HM, Alkhamees OA, et al. Gender difference following high  
35  
36 17 cholesterol diet induced renal injury and the protective role of rutin and ascorbic acid  
37  
38 18 combination in Wistar albino rats. *Lipids Health Dis* 2012;11:41. doi: 10.1186/1476-5  
39  
40 19 11X-11-41
- 41  
42 20 39. Jiao Y, Chen H, Yan J, et al. Genome-wide gene expression profiles in antioxidant pathw  
43  
44 21 ays and their potential sex differences and connections to vitamin C in mice. *Int J M*  
45  
46 22 *ol Sci* 2013;14(5):10042-62. doi: 10.3390/ijms140510042

1  
2  
3  
4 15  
6  
7 **Table legends**8  
9 **Table 1. Study population characteristics.**10  
11  
12 ¶, numbers represent mean percentages (standard deviation).13  
14  
15  
16  
1718 **Table 2. Mean values of adjusted lung function measurements across quintiles of vitamin A,**  
19 **carotene, and vitamin C intake.**20  
21  
22 Data were adjusted for age, sex, body mass index, energy intake, number of comorbid diseases,  
23 alcohol consumption, smoking history, pack years (smoking amount), household income, and  
24 education level.  
25  
26  
2728  
29 *P* values were determined using tests for linear trends across increasing quintiles (means) of  
30 antioxidant vitamin intake.  
31  
3233  
34  
35  
3637 **Table 3. Association between vitamin A, carotene, and vitamin C intake and COPD according to**  
38 **gender and smoking status.**39  
40  
41  
42 OR was determined following adjustment for age, body mass index, energy intake, number of  
43 comorbid diseases, alcohol consumption, household income, and education level.  
44  
4546  
47 ¶, The risk for COPD was significantly different between Q1 and Q5.  
48  
4950  
51  
5253 **Table 4. Mean values of adjusted forced expiratory volume in 1-second (FEV<sub>1</sub>) measurements**  
54 **across quintiles of vitamin A, carotene, and vitamin C intake (energy-adjusted) in subjects with**  
55 **COPD.**  
56  
57  
58  
59  
60

1  
2  
3  
4 1 Adjusted for age, body mass index, energy intake, number of comorbid diseases, alcohol consumption,  
5  
6 2 household income, and education level.

7  
8  
9 3 *P* values were determined using tests for linear trends across increasing quintiles (means) of  
10  
11 4 antioxidant vitamin intake.

#### 12 13 14 5 **Figure Legends**

15  
16  
17 6 **Figure 1. Odds ratios for the association between antioxidant vitamin intake and COPD among**  
18  
19 7 **(a) male and (b) female smokers and non-smokers.**

20  
21 8 Odds ratios were adjusted for age, body mass index, energy intake, number of comorbid diseases,  
22  
23 9 alcohol consumption, household income, and education level.

24  
25  
26  
27  
28  
29  
30  
31  
32  
33  
34  
35  
36  
37  
38  
39  
40  
41  
42  
43  
44  
45  
46  
47  
48  
49  
50  
51  
52  
53  
54  
55  
56  
57  
58  
59  
60

11 10  
12 11 **Figure 2. Mean values of adjusted forced expiratory volume in 1-second (FEV<sub>1</sub>) measurements**  
13 12 **across quintiles of vitamin A, carotene, and vitamin C intake (energy-adjusted) in male COPD**  
14 13 **patients according to smoking status.**

15 14 Values were adjusted for age, body mass index, energy intake, number of comorbid diseases, alcohol  
16 15 consumption, household income, and education level. *P*-values were determined using tests for linear  
17 16 trends across increasing quintiles (median) of antioxidant vitamin intake.

**Table 1. Study population characteristics**

|                                       | Total<br>(n=21,148) | Male smokers<br>(n=7,178) | Male non-smokers<br>(n=1,626) | Female smokers<br>(n=808) | Female non-smokers<br>(n=11,536) | P value |
|---------------------------------------|---------------------|---------------------------|-------------------------------|---------------------------|----------------------------------|---------|
| Age <sup>¶</sup>                      | 57.4 (10.9)         | 57.8 (11.0)               | 57.9 (11.3)                   | 57.4 (12.5)               | 57.1 (10.8)                      | <0.001  |
| 40–49                                 | 6048 (28.6)         | 1998 (27.8)               | 464 (28.5)                    | 273 (33.8)                | 3313 (28.7)                      | <0.001  |
| 50–59                                 | 6131 (29.0)         | 1981 (27.6)               | 431 (26.5)                    | 199 (24.6)                | 3520 (30.5)                      |         |
| 60–69                                 | 5387 (25.5)         | 1913 (26.7)               | 430 (26.4)                    | 158 (19.6)                | 2866 (25.0)                      |         |
| 70–                                   | 3582 (16.9)         | 1286 (17.9)               | 301 (18.5)                    | 178 (22.0)                | 1817 (15.8)                      |         |
| BMI <sup>¶</sup>                      | 24.2 (3.0)          | 24.2 (2.8)                | 24.3 (2.8)                    | 23.8 (3.6)                | 24.2 (3.2)                       | 0.007   |
| Education                             |                     |                           |                               |                           |                                  | <0.001  |
| Elementary                            | 7229 (34.2)         | 1763 (24.6)               | 321 (19.7)                    | 381 (47.2)                | 4764 (41.3)                      |         |
| Middle school                         | 3315 (15.7)         | 1216 (16.9)               | 267 (16.4)                    | 112 (13.9)                | 1720 (14.9)                      |         |
| High school                           | 6427 (30.4)         | 2366 (33.0)               | 458 (28.2)                    | 228 (28.2)                | 3375 (29.3)                      |         |
| More than college                     | 4169 (19.7)         | 1831 (25.5)               | 580 (35.7)                    | 87 (10.8)                 | 1671 (14.5)                      |         |
| Household income                      |                     |                           |                               |                           |                                  | <0.001  |
| 1st quartile                          | 4763 (22.5)         | 1440 (20.1)               | 289 (17.8)                    | 315 (39.0)                | 2719 (23.6)                      |         |
| 2nd quartile                          | 5427 (25.7)         | 1874 (26.1)               | 391 (24.1)                    | 223 (27.6)                | 2939 (25.5)                      |         |
| 3rd quartile                          | 5162 (24.4)         | 1869 (26.1)               | 414 (25.5)                    | 145 (17.9)                | 2734 (23.7)                      |         |
| 4th quartile                          | 5780 (27.3)         | 1988 (27.7)               | 530 (32.6)                    | 125 (15.5)                | 3137 (27.2)                      |         |
| Comorbidity <sup>¶</sup>              | 0.9 (1.1)           | 0.9 (1.0)                 | 0.8 (0.9)                     | 1.0 (1.2)                 | 1.0 (1.1)                        | <0.001  |
| Pack years <sup>¶</sup>               | 4.7 (13.6)          | 13.3 (20.3)               | 0.2 (2.2)                     | 3.3 (11.9)                | 0.0 (0.0)                        | <0.001  |
| Alcohol                               | 17554 (83.0)        | 6877 (95.8)               | 1399 (86.0)                   | 714 (88.4)                | 8564 (74.2)                      | <0.001  |
| Energy intake (Kcal/day) <sup>¶</sup> | 1901.5 (797.8)      | 2266.5 (869.7)            | 2212.6 (855.9)                | 1538.2 (653.4)            | 1656.0 (630.0)                   | <0.001  |
| Vitamin A (µg RE/day) <sup>¶</sup>    | 822.5 (1118.5)      | 881.9 (1067.5)            | 925.5 (1095.2)                | 600.3 (644.2)             | 786.6 (1173.9)                   | <0.001  |
| Carotene (µg/day) <sup>¶</sup>        | 4337.3 (6206.0)     | 4596.2 (5557.8)           | 4803.8 (5506.6)               | 3143.5 (3682.6)           | 4194.1(6780.6)                   | <0.001  |
| Vitamin C (mg/day) <sup>¶</sup>       | 111.9 (107.6)       | 111.8 (97.9)              | 128.8 (107.1)                 | 84.8 (96.9)               | 111.5 (113.5)                    | <0.001  |
| FEV <sub>1</sub> (ml) <sup>¶</sup>    | 2.60 (0.67)         | 3.02 (0.68)               | 3.09 (0.66)                   | 2.23 (0.56)               | 2.30 (0.46)                      | <0.001  |
| FVC (ml) <sup>¶</sup>                 | 3.38 (0.84)         | 4.07 (0.72)               | 4.04 (0.73)                   | 2.88 (0.62)               | 2.89 (0.51)                      | <0.001  |
| FEV1/FVC (%) <sup>¶</sup>             | 77.3 (7.9)          | 73.9 (9.1)                | 76.6 (7.9)                    | 77.2 (8.0)                | 79.5 (6.1)                       | <0.001  |
| COPD                                  | 3,005 (14.2)        | 1893 (26.4)               | 256 (15.7)                    | 119 (14.7)                | 737 (6.4)                        | <0.001  |

¶, numbers represent mean percentages (standard deviation).

**Table 2. Mean values of adjusted lung function measurements across quintiles of vitamin A, carotene, and vitamin C intake.**

|                                | Q1    | Q2     | Q3     | Q4     | Q5      | Difference between Q5 and Q1 (95% CI) | <i>P</i> value for trend |
|--------------------------------|-------|--------|--------|--------|---------|---------------------------------------|--------------------------|
| <b>Vitamin A</b>               |       |        |        |        |         |                                       |                          |
| Mean intake (µg RE)            | 151.2 | 353.6  | 573.1  | 893.9  | 2140.8  |                                       |                          |
| FEV <sub>1</sub> (ml)          | 2379  | 2388   | 2406   | 2395   | 2404    | 25 (5,45)                             | 0.032                    |
| FVC(ml)                        | 3119  | 3135   | 3156   | 3148   | 3150    | 31 (7,54)                             | 0.013                    |
| Predicted FEV <sub>1</sub> (%) | 91.37 | 91.39  | 91.79  | 91.37  | 91.77   | 0.40 (-0.24,1.04)                     | 0.393                    |
| Predicted FVC (%)              | 90.93 | 91.02  | 91.38  | 91.18  | 91.4    | 0.47 (-0.08,1.02)                     | 0.326                    |
| <b>Carotene</b>                |       |        |        |        |         |                                       |                          |
| Mean intake (µg)               | 691.1 | 1747.4 | 2938.9 | 4736.1 | 11574.1 |                                       |                          |
| FEV <sub>1</sub> (ml)          | 2347  | 2361   | 2373   | 2367   | 2374    | 27 (8,47)                             | 0.038                    |
| FVC (ml)                       | 3088  | 3115   | 3125   | 3118   | 3122    | 34(11,57)                             | 0.011                    |
| Predicted FEV <sub>1</sub> (%) | 91.55 | 91.96  | 92.16  | 91.75  | 92.16   | 0.61 (-0.17,1.24)                     | 0.203                    |
| Predicted FVC (%)              | 91.02 | 91.63  | 91.71  | 91.36  | 91.74   | 0.72 (0.18,1.26)                      | 0.032                    |
| <b>Vitamin C</b>               |       |        |        |        |         |                                       |                          |
| Mean intake (mg)               | 24.2  | 53.6   | 84.2   | 128.8  | 268.9   |                                       |                          |
| FEV <sub>1</sub> (ml)          | 2411  | 2421   | 2433   | 2436   | 2447    | 36 (16,56)                            | 0.004                    |
| FVC (ml)                       | 3117  | 3121   | 3131   | 3137   | 3152    | 35 (12,58)                            | 0.027                    |
| Predicted FEV <sub>1</sub> (%) | 91.3  | 91.43  | 91.79  | 91.82  | 92      | 0.70 (0.67,1.33)                      | 0.169                    |
| Predicted FVC (%)              | 91.29 | 91.29  | 91.52  | 91.68  | 91.91   | 0.62 (0.75,1.16)                      | 0.118                    |

Data were adjusted for age, sex, body mass index, energy intake, number of comorbid diseases, alcohol consumption, smoking history, pack years (smoking amount), household income, and education level. *P* values were determined using tests for linear trends across increasing quintiles (means) of antioxidant vitamin intake.



**Table 3. Association between vitamin A, carotene, and vitamin C intake and COPD according to gender and smoking status.**

|                    | Intake |      | COPD |     | OR                            |                                | <i>P</i> interaction |
|--------------------|--------|------|------|-----|-------------------------------|--------------------------------|----------------------|
|                    | Q5     | Q1   | Q5   | Q1  | Q5                            | Q1                             |                      |
| <b>Vitamin A</b>   |        |      |      |     |                               |                                |                      |
| Female non-smokers | 2096   | 2564 | 105  | 242 | ref                           | 1.19 (0.92,1.53)               | <0.001               |
| Female smokers     | 109    | 264  | 16   | 53  | 3.44 (1.86,6.34)              | 2.00 (1.34,2.99)               |                      |
| Male non-smokers   | 394    | 225  | 53   | 47  | 3.29 (2.26,4.78)              | 3.20 (2.14,4.78)               |                      |
| Male smokers       | 1630   | 1176 | 320  | 444 | 4.11 (3.10,5.44) <sup>¶</sup> | 5.42 (4.09,7.18) <sup>¶</sup>  |                      |
| <b>Carotene</b>    |        |      |      |     |                               |                                |                      |
| Female non-smokers | 2118   | 2529 | 108  | 226 | ref                           | 1.11 (0.86, 1.43)              | <0.001               |
| Female smokers     | 104    | 268  | 15   | 49  | 3.12 (1.66, 5.85)             | 1.82 (1.21, 2.74)              |                      |
| Male non-smokers   | 397    | 243  | 55   | 50  | 3.42 (2.36, 4.94)             | 3.24 (2.19, 4.79)              |                      |
| Male smokers       | 1610   | 1189 | 321  | 425 | 4.51 (3.41, 5.98)             | 5.27 (3.98, 6.98)              |                      |
| <b>Vitamin C</b>   |        |      |      |     |                               |                                |                      |
| Female non-smokers | 2303   | 2466 | 112  | 465 | ref                           | 1.04 (0.81,1.35)               | <0.001               |
| Female smokers     | 107    | 294  | 12   | 35  | 2.23 (1.15,4.32)              | 1.87 (1.26, 2.78)              |                      |
| Male non-smokers   | 401    | 191  | 55   | 55  | 3.33 (2.31,4.80)              | 3.24 (2.08, 5.03)              |                      |
| Male smokers       | 1419   | 1278 | 317  | 204 | 4.77 (3.62,6.30) <sup>¶</sup> | 5.61 (4.26, 7.39) <sup>¶</sup> |                      |

OR (Odd ratio) was determined following adjustment for age, body mass index, energy intake, number of comorbid diseases, alcohol consumption, household income, and education level.

<sup>¶</sup>, The risk for COPD was significantly different between Q1 and Q5.

**Table 4. Mean values of adjusted forced expiratory volume in 1-second (FEV<sub>1</sub>) measurements across quintiles of vitamin A, carotene, and vitamin C intake (energy-adjusted) in subjects with COPD.**

|                    | Q1   | Q2   | Q3   | Q4   | Q5   | Difference between 5 and 1 (95% CI) | <i>P</i> value for trend | <i>P</i> value for interaction |
|--------------------|------|------|------|------|------|-------------------------------------|--------------------------|--------------------------------|
| <b>Vitamin A</b>   |      |      |      |      |      |                                     |                          |                                |
| COPD               | 1990 | 1999 | 2035 | 2056 | 2030 | 40 (-18,99)                         | 0.126                    | 0.069                          |
| Male smokers       | 2213 | 2218 | 2304 | 2303 | 2279 | 66 (-13,145)                        | 0.024                    |                                |
| Male non-smokers   | 2334 | 2254 | 2242 | 2375 | 2280 | -54 (-262,154)                      | 0.672                    |                                |
| Female smokers     | 1639 | 1562 | 1501 | 1459 | 1628 | -11(-271, 249)                      | 0.599                    |                                |
| Female non-smokers | 1589 | 1659 | 1565 | 1656 | 1649 | 60 (-38,158)                        | 0.169                    |                                |
| <b>Carotene</b>    |      |      |      |      |      |                                     |                          |                                |
| COPD               | 1993 | 2022 | 2043 | 2055 | 2042 | 49 (-9,108)                         | 0.195                    | 0.044                          |
| Male smokers       | 2211 | 2250 | 2296 | 2317 | 2276 | 65 (-13,144)                        | 0.046                    |                                |
| Male non-smokers   | 2329 | 2255 | 2230 | 2357 | 2341 | 12 (-188, 213)                      | 0.665                    |                                |
| Female smokers     | 1689 | 1545 | 1435 | 1428 | 1626 | -63 (-325,198)                      | 0.094                    |                                |
| Female non-smokers | 1573 | 1649 | 1628 | 1600 | 1657 | 84 (-14,183)                        | 0.299                    |                                |
| <b>Vitamin C</b>   |      |      |      |      |      |                                     |                          |                                |
| COPD               | 2025 | 2042 | 2087 | 2090 | 2087 | 62 (5,120)                          | 0.056                    | 0.179                          |
| Male smokers       | 2235 | 2278 | 2330 | 2314 | 2336 | 101(25, 178)                        | 0.039                    |                                |
| Male non-smokers   | 2402 | 2256 | 2330 | 2459 | 2256 | -146 (-370,78)                      | 0.138                    |                                |
| Female smokers     | 1603 | 1600 | 1630 | 1597 | 1563 | -40 (-318,239)                      | 0.997                    |                                |
| Female non-smokers | 1594 | 1595 | 1618 | 1632 | 1687 | 93 (-11,198)                        | 0.433                    |                                |

Adjusted for age, body mass index, energy intake, number of comorbid diseases, alcohol consumption, household income, and education level. *P* values were determined using tests for linear trends across increasing quintiles (means) of antioxidant vitamin intake.

1  
2  
3  
4  
5  
6  
7  
8  
9  
10  
11  
12  
13  
14  
15  
16  
17  
18  
19  
20  
21  
22  
23  
24  
25  
26  
27  
28  
29  
30  
31  
32  
33  
34  
35  
36  
37  
38  
39  
40  
41  
42  
43  
44  
45  
46  
47  
48  
49  
50  
51  
52  
53  
54  
55  
56  
57  
58  
59  
60

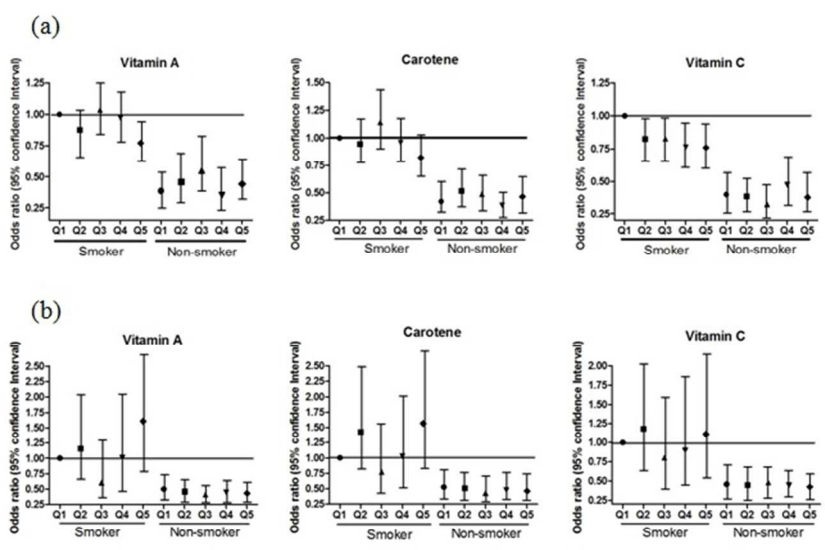

206x133mm (96 x 96 DPI)

Review only

1  
2  
3  
4  
5  
6  
7  
8  
9  
10  
11  
12  
13  
14  
15  
16  
17  
18  
19  
20  
21  
22  
23  
24  
25  
26  
27  
28  
29  
30  
31  
32  
33  
34  
35  
36  
37  
38  
39  
40  
41  
42  
43  
44  
45  
46  
47  
48  
49  
50  
51  
52  
53  
54  
55  
56  
57  
58  
59  
60

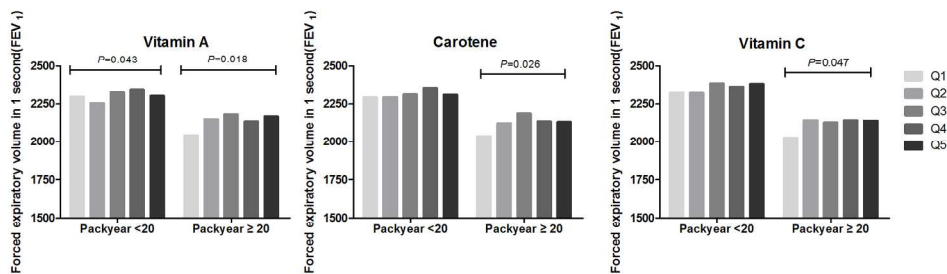

168x55mm (300 x 300 DPI)

peer review only

# BMJ Open

## Effects of dietary antioxidant vitamins on lung functions according to gender and smoking status in Korea: A population-based cross-sectional study

|                                 |                                                                                                                                                                                                                                                                                                                                                                                                                                       |
|---------------------------------|---------------------------------------------------------------------------------------------------------------------------------------------------------------------------------------------------------------------------------------------------------------------------------------------------------------------------------------------------------------------------------------------------------------------------------------|
| Journal:                        | <i>BMJ Open</i>                                                                                                                                                                                                                                                                                                                                                                                                                       |
| Manuscript ID                   | bmjopen-2017-020656.R1                                                                                                                                                                                                                                                                                                                                                                                                                |
| Article Type:                   | Research                                                                                                                                                                                                                                                                                                                                                                                                                              |
| Date Submitted by the Author:   | 16-Jan-2018                                                                                                                                                                                                                                                                                                                                                                                                                           |
| Complete List of Authors:       | Hong, Ji Young; Chuncheon Sacred Heart Hospital, Lee, Chang Youl; Chuncheon Sacred Heart Hospital, Hallym University Medical Center, Division of Pulmonary and Critical Care Medicine, Department of Medicine<br>Lee, Myung Goo; Chuncheon Sacred Heart Hospital, Hallym University Medical Center, Division of Pulmonary and Critical Care Medicine, Department of Medicine<br>Kim, Young Sam; Yonsei University College of Medicine |
| <b>Primary Subject Heading</b>: | Respiratory medicine                                                                                                                                                                                                                                                                                                                                                                                                                  |
| Secondary Subject Heading:      | Nutrition and metabolism                                                                                                                                                                                                                                                                                                                                                                                                              |
| Keywords:                       | lung function, gender, smoking, antioxidant vitamins                                                                                                                                                                                                                                                                                                                                                                                  |
|                                 |                                                                                                                                                                                                                                                                                                                                                                                                                                       |

SCHOLARONE™  
Manuscripts

Only

1  
2  
3  
4 **1 Effects of dietary antioxidant vitamins on lung functions**  
5  
6  
7 **2 according to gender and smoking status in Korea: A population-**  
8  
9  
10 **3 based cross-sectional study**  
11  
12  
13  
14  
15  
16

17 Ji Young Hong, MD, PhD<sup>1,2</sup>, Chang Youl Lee, MD, PhD<sup>1,2</sup>, Myung Goo Lee, MD, PhD<sup>1,2</sup>,  
18  
19 Young Sam Kim, MD, PhD<sup>3</sup>  
20  
21

- 22  
23  
24 1. Division of Pulmonary and Critical Care Medicine, Department of Medicine, Chuncheon Sacred  
25  
26 Heart Hospital, Hallym University Medical Center, Chuncheon, Gangwon-do, Republic of Korea.  
27  
28 2. Lung Research Institute of Hallym University College of Medicine  
29  
30 3. Division of Pulmonology, Department of Internal Medicine, Yonsei University College of  
31  
32 Medicine, 50 Yonseiro, Seodaemun-gu, Seoul 120-752, Republic of Korea  
33  
34

35  
36  
37 **14 Corresponding Author:**  
38

39 Young Sam Kim, M.D., Ph.D.  
40

41  
42 Professor  
43

44 Division of Pulmonology, Department of Internal Medicine  
45

46 Yonsei University College of Medicine  
47

48 50 Yonseiro, Seodaemun-gu, Seoul 120-752, Republic of Korea  
49

50  
51 Tel: 82-2-2228-1955, Fax: 82-2-393-6884 E-mail: [ysamkim@yuhs.ac](mailto:ysamkim@yuhs.ac)  
52

53  
54  
55  
56  
57  
58  
59  
60

## Abstract

**Objective:** Cigarette smoke-induced oxidative stress plays an important role in the pathogenesis of chronic obstructive pulmonary disease (COPD). Dietary antioxidants are thought to prevent smoke-induced oxidative damage. The aim of this study was to investigate associations between lung function and the consumption of antioxidant vitamins in Korean adults.

**Methods:** In total, 21,148 participants from the Korean National Health and Nutrition Examination Survey (2007–2014) were divided into four groups based on smoking history and gender. Multivariate regression models were used to evaluate associations between lung function and intake of dietary antioxidants.

**Results:** Subjects in the highest-intake quintile (Q5) of vitamin A, carotene, and vitamin C intake had mean forced expiratory volume in 1 second (FEV<sub>1</sub>) measurements that were 30 ml, 32 ml, and 36 ml higher than those of individuals in the lowest-intake quintile (Q1), respectively (*P* for trend; *P*=0.008, *P*=0.010, and *P*<0.001, respectively). The risks of COPD for male smokers in Q1 increased 7.60-fold (95% CI=5.92–9.76), 7.16-fold (95% CI=5.58–9.19), and 7.79-fold (95% CI=6.12–9.92), for vitamin A, carotene, and vitamin C, respectively, compared to those of female non-smokers in Q5. Among COPD patients, males who smoked >20 pack years had mean FEV<sub>1</sub> measurements that were 192 ml, 149 ml, and 177 ml higher than those of patients in Q1 (*P* for trend; *P*=0.018, *P*=0.024, and *P*=0.043, respectively).

**Conclusions:** These findings indicate that the influence of antioxidant vitamins on lung function depends on gender and smoking status in the Korean COPD population.

**Keywords:** lung function, gender, smoking, antioxidant vitamins

1  
2  
3  
4 1  
5  
6  
7 2  
8  
9 3  
10  
11 4  
12  
13  
14 5  
15  
16  
17 6  
18  
19 7  
20  
21  
22 8  
23  
24  
25 9  
26  
27  
28 10  
29  
30  
31 11  
32  
33 12  
34  
35  
36 13  
37  
38  
39 14  
40  
41  
42 15  
43  
44  
45 16  
46  
47 17  
48  
49  
50 18  
51  
52  
53 19  
54

**Strengths and limitation of this study**

- This study revealed that the influence of antioxidant vitamins on lung function depends on gender and smoking status in Korean patients with COPD.
- A cross-sectional study with a large sample size collected from a national health survey
- Main limitations include a possible recall bias and no further verification of nutritional intake.

For peer review only



1

2 **Introduction**

3

4 Chronic obstructive pulmonary disease (COPD) causes morbidity and mortality<sup>1</sup>. Smoking is a  
5 primary risk factor for COPD; however, other factors also contribute as only 10–20% of smokers  
6 develop airflow limitations<sup>2</sup>.

7 Dietary antioxidants protect against oxidative stress caused by smoking<sup>3</sup>, and multiple studies have  
8 revealed associations between the intake of antioxidant vitamins or fibers and respiratory diseases<sup>4-8</sup>.  
9 However, evidence supporting the benefits of vitamin supplement therapy is lacking<sup>9 10</sup>.

10 Because micronutrient status is affected by dietary intake and metabolic turnover, which are regulated  
11 by oxidative stress, the benefits of antioxidant vitamins may vary by gender and smoking status.  
12 Multiple studies have shown that different antioxidants exhibit different effects based on smoking  
13 status. Morabia *et al.* reported an association between airway obstruction and vitamin A intake in  
14 smokers compared to former smokers, whereas Hu *et al.* reported that carotene was less strongly  
15 associated with FEV<sub>1</sub> in smokers compared to former smokers and non-smokers<sup>11 12</sup>.

16 This study used KNHANES data to investigate whether dietary antioxidant vitamins were  
17 independently associated with pulmonary function and COPD in the Korean population. This study  
18 also evaluated whether the effects of antioxidant vitamins on pulmonary function differed based on  
19 gender or smoking status.

20

21

22

1

## 2 **Patients and Methods**

3

### 4 ***Study population***

5 Participants were sampled from Korean National Health and Nutritional Examination Survey  
6 (KNHANES; 2007–2014) IV–VI, a nationwide survey designed to be representative of the population  
7 that is used to establish health policies. KNHANES contains a massive database with information  
8 about demographic characteristics, comorbidities, lung function, nutritional status, and health  
9 (<https://knhanes.cdc.go.kr/knhanes>).

10 A two-stage stratified systemic sampling method was use to select 65,973 individuals to survey  
11 between February 2007 and December 2014. Of the chosen individuals, 34,278 participants over 40  
12 years of age responded to questionnaires regarding diet and smoking history and underwent a medical  
13 examination. After excluding subjects who omitted lung function or nutrition data, we analyzed data  
14 from 21,148 (8,804 men and 12,344 women) in this study. This study was approved by the  
15 Institutional Review Board of the Korean Centers for Disease Control and Prevention. All participants  
16 provided informed written consent.

### 18 **Protocol**

19 KNHANES collects survey data through health questionnaire surveys, screening surveys, and  
20 nutrition surveys. Health questionnaires were divided into household survey, health interview survey,  
21 and health behavior survey. The health interview survey examined the use of medical services,  
22 activity limitations, education and economic activities, and physical activity by interview method. The  
23 health behavior survey examined smoking status, drinking, mental health, and safety consciousness by  
24 self - filling method. The screening consisted of physical measurement, blood pressure and pulse

1 measurement, blood and urine test, oral examination, pulmonary function test, visual and refractive  
2 examination, color vision test, hearing test, and muscle strength test. Nutrition surveys consisted of  
3 dietary behaviors, dietary supplements, nutritional knowledge, and the contents of food intake (24-  
4 hour recall method) a day before the survey.

### 5 6 ***Spirometry and airflow obstruction definitions***

7 The pulmonary function test (PFT) was performed using dry-rolling seal volume spirometers (Model  
8 2130; Sensor Medics, Yorba Linda, CA, USA) and standardized according to the American Thoracic  
9 Society/European Respiratory Society criteria<sup>13</sup>. Qualified technicians and principal investigators  
10 assessed the spirometry data for acceptability and reproducibility. The predictive equations for the  
11 forced expiratory volume in 1 second (FEV<sub>1</sub>) and the forced vital capacity (FVC) were derived from  
12 survey data on non-smokers who had normal chest X-rays and no previous history of respiratory  
13 diseases<sup>14</sup>. COPD was defined as a FEV<sub>1</sub>/FVC <70 %<sup>15</sup>.

### 14 15 ***Dietary assessments***

16 Food intake data were obtained using the 24-h recall method, in which participants were asked to  
17 report the foods and amounts thereof consumed during the previous 24 hours. Total energy (kJ/d  
18 (kcal/d)) and total intake of antioxidant vitamins were calculated using the Korean Food Composition  
19 Table<sup>16</sup> as the reference. Antioxidant vitamin consumption was adjusted for total energy intake.

### 20 21 ***Potential confounders***

22 Data regarding demographic information, education level, household income, smoking status,  
23 smoking amount, alcohol intake, place of residence, body mass index (BMI), and comorbid diseases  
24 were obtained. Educational level was categorized as elementary school or lower, completion of  
25 middle school, completion of high school, and college or higher. Household income was divided by  
26 quartile. Place of residence was divided to rural and urban.

1 Smokers were subjects who smoked more than 100 cigarettes in their lifetime<sup>17</sup>. Participants were  
2 categorized in terms of smoking status as follows: smoker, ex-smoker, or never smoked. Those who  
3 answered in the negative to the question ‘Do you currently smoke?’ were defined as ex-smokers.

4 The smoking amount was determined in pack years, which was calculated by multiplying the duration  
5 of smoking (years) by the number of packs of cigarettes smoked. Comorbid diseases included  
6 hypertension, stroke, cardiovascular disease, arthritis, tuberculosis, asthma, diabetes mellitus, thyroid  
7 disorders, renal failure, liver disease, and malignancy.

### 8 9 ***Statistical analysis***

10 A total of 21,148 subjects participated in this study (Figure 1). The relationship between antioxidant  
11 vitamin intake and lung function was analyzed using multiple linear regression analyses. We analyzed  
12 the energy-adjusted antioxidant vitamin intake by quintiles. The adjustment factors were age, sex,  
13 BMI, educational level, household income, total energy intake, place of residence, number of  
14 comorbid diseases, smoking history, alcohol intake, and pack years<sup>4 11 18</sup>. Assessments of linear trends  
15 across increasing antioxidant vitamin quintiles were also performed.

16 We estimated the odds ratios (ORs) of COPD using multivariate logistic regression analyses of  
17 quintiles after adjusting for confounding factors. Participants were divided into four groups based on  
18 gender and smoking status (male smokers, male non-smokers, female smokers, female non-smokers),  
19 to determine whether the relationship between COPD risk and antioxidant vitamin intake is related to  
20 gender and smoking status. For combined analyses between the effects of antioxidant vitamin intake,  
21 gender, and smoking status on the risk of COPD, interaction tests were performed. COPD patients and  
22 male COPD patients were analyzed separately. We attempted to determine whether the association of  
23 antioxidant vitamins and lung function varies with gender and smoking status in patients with COPD.  
24 Multiple linear regression analyses were performed after categorizing COPD patients by smoking

1 status and amount.

2 Statistical analyses were performed using PASW Statistics ver. 20 (SPSS Inc., Chicago IL, USA) and  
3 SAS ver. 9.4 (SAS Institute, Cary, NC, USA) software. *P*-values <0.05 were considered statistically  
4 significant.

For peer review only

## 1 Results

2  
3  
4  
5  
6  
7  
8 The baseline characteristics of the 21,148 participants are shown in Table 1. All subjects were  
9  
10 classified into four groups based on smoking history and gender. Of the 7,986 smokers, 7,178 were  
11  
12 male (mean age, 57.8±11.0 years) and 808 were female (mean age, 57.4±12.5 years). Of the 13,162  
13  
14 individuals who had never smoked, 1,626 were male (mean age, 57.9±11.3 years) and 11,536 were  
15  
16 female (mean age, 57.1±10.8 years). Among all subjects, 3,005 were diagnosed with COPD. The  
17  
18 prevalence of COPD was highest in male smokers (26.4%) and lowest in female non-smokers (6.4%).  
19  
20 The four groups differed regarding age, BMI, educational level, household income, and alcohol usage  
21  
22 ( $P<0.001$ ). Energy intake was significantly higher in males than females (males, 2,256.5 kcal; females,  
23  
24 1,648.3 kcal;  $P<0.001$ ). The levels of vitamin A, carotene, and vitamin C were highest in the male  
25  
26 non-smoker group and lowest in the female smoker group. Korean male non-smokers are pre-  
27  
28 disposed to COPD compared to female non-smokers (incidence rate of 15.7% versus 6.4%). Age and  
29  
30 the percentage of alcohol intake were higher in Korean male non-smokers than female non-smokers.  
31  
32  
33 Table 2 showed the association between lung function (FEV<sub>1</sub>, FVC) and dietary antioxidant vitamin  
34  
35 levels. Participants in the highest quintile (Q5) of vitamin A intake had 30 ml higher FEV<sub>1</sub> ( $P$  for trend  
36  
37 across quintiles = 0.008) and 33 ml higher FVC ( $P$  for trend across quintiles = 0.007) compared to  
38  
39 participants in the lowest quintile (Q1). Participants in Q5 for carotene intake had 32 ml higher FEV<sub>1</sub>  
40  
41 ( $P$  for trend across quintiles = 0.010) and 36 ml higher FVC ( $P$  for trend across quintiles = 0.005)  
42  
43 measurements compared to participants in Q1. Participants in Q5 of vitamin C intake had 36 ml  
44  
45 higher FEV<sub>1</sub> ( $P$  for trend across quintiles <0.001) and 35 ml higher FVC ( $P$  for trend across quintiles  
46  
47 = 0.014) measurements compared to participants in Q1. A statistically significant dose–response  
48  
49 relationship was observed (all,  $P$  for trend across quintiles <0.005), but participants in Q3 of vitamin  
50  
51 A and carotene had comparable lung function to those in Q5.  
52  
53  
54  
55  
56  
57  
58  
59  
60

1 The effects of gender, smoking, and dietary antioxidant vitamins on the risk of COPD are summarized  
2 in Table 3. The risk of COPD for male smokers in Q1 for vitamin A, carotene, and vitamin C intake  
3 increased by 7.60-fold (95% CI=5.92–9.76), 7.16-fold (95% CI=5.58–9.19), and 7.79-fold (95%  
4 CI=6.12-9.92), respectively, which was greater than that observed for female non-smokers in Q5 for  
5 antioxidant vitamin intake. Interestingly, the risk of COPD for male non-smokers in Q5 for vitamin A,  
6 carotene, and vitamin C intake increased by 3.26-fold (95% CI=2.24-4.75), 3.35-fold (95% CI=2.31-  
7 4.86) and 3.28-fold (95% CI=2.27-4.73), respectively, compared with female non-smokers in Q5 for  
8 antioxidant vitamin intake. The risk of COPD for male non-smokers in Q1 for vitamin A, carotene,  
9 and vitamin C intake increased by 2.80-fold (95% CI=1.90-4.12), 3.25-fold (95% CI=2.21-4.78) and  
10 3.17-fold (95% CI=2.04-4.91), respectively, compared with female non-smokers in Q1 for antioxidant  
11 vitamin intake. These results suggest that men may have other causes of COPD as well as smoking,  
12 compared with women who took similar amounts of antioxidant vitamins.

13 The interaction exists between the antioxidant vitamin intake and gender/smoking status on the risk of  
14 COPD (all *P*-values <0.001). The effect of the antioxidant vitamin intake depends on the  
15 gender/smoking status. When assessing the risk of COPD following reduction of antioxidant intake  
16 from Q5 to Q1, only male smokers showed significant difference in risk of COPD, but other three  
17 groups did not. Figure 2 shows that the risk of COPD was influenced by dietary antioxidant vitamin  
18 levels in male smokers, in detail. In male smokers, the risk of COPD in subjects in Q5 for antioxidant  
19 vitamins intake was significantly lower than that for subjects in Q1 (vitamin A, OR = 0.77, 95% CI =  
20 0.63–0.94, *P* = 0.009; carotene, OR = 0.81, 95% CI = 0.67–0.99, *P*=0.041; vitamin C, OR = 0.74,  
21 95% CI = 0.61–0.91, *P* = 0.004). The dose –dependent effect of vitamin C was observed between  
22 COPD risk and dietary antioxidant vitamin levels, but it was not for vitamin A and carotene. Although  
23 not significant, Q3 group of carotene had increased risk to develop COPD than Q1 group of carotene.

24 The prevalence of COPD did not increase significantly as the intake of dietary antioxidant vitamins

1 increased in male non-smokers, female smokers, or female non-smokers. No significant interaction  
2 between the effects of antioxidant vitamins on COPD and smoking status was observed. The  
3 correlation between the risk of COPD and antioxidant vitamin intake was stronger in male smokers  
4 who smoked less than 20 pack years (not shown).

5 We investigated the association between dietary antioxidant vitamin intake and lung function after  
6 limiting the analyses to individuals with COPD. The changes in FEV<sub>1</sub> were not statistically significant  
7 based on the levels of dietary antioxidant vitamins in subjects with COPD. Similar to the previous  
8 results, only male smokers in subjects with COPD, exhibited a beneficial association between dietary  
9 antioxidant vitamin intake and FEV<sub>1</sub> (Figure 3). Male smokers with COPD in Q5 for vitamin A intake  
10 had a 71-ml higher FEV<sub>1</sub> (*P* for trend across quintiles = 0.019) compared to those in Q1. Male  
11 smokers with COPD in Q5 of carotene and vitamin C intake had 71-ml higher FEV<sub>1</sub> (*P* for trend  
12 across quintiles = 0.037) and a 109-ml higher FEV<sub>1</sub> (*P* for trend across quintiles = 0.026), respectively,  
13 compared to individuals in Q1.

14 Additional analyzes were performed to determine if lung function was reduced by smoking amount or  
15 smoking status in male smoker- COPD patients. Male COPD patients who had smoked  $\geq 20$  pack  
16 years exhibited a beneficial association between dietary antioxidant vitamin intake and FEV<sub>1</sub> (Figure  
17 4). Male COPD patients in Q5 of vitamin A intake who had smoked  $\geq 20$  pack years had a 192-ml  
18 higher FEV<sub>1</sub> (*P* for trend across quintiles = 0.018) compared to individuals in Q1. COPD patients in  
19 Q5 of carotene intake who had smoked  $\geq 20$  pack years had a 149-ml higher FEV<sub>1</sub> (*P* for trend across  
20 quintiles = 0.024) compared with patients in Q1. COPD patients in Q5 of vitamin C intake who had  
21 smoked  $>20$  pack years had a 177-ml higher FEV<sub>1</sub> (*P* for trend across quintiles = 0.043) compared to  
22 patients in Q1.

23



## Discussion

This study examined the association between the intake of antioxidant vitamins and lung functions in the Korean population. Previous studies showed that antioxidant vitamins, including vitamin C, were protective of the human lung<sup>5,12</sup>, whereas high levels of vitamin A and carotene were also associated with increased lung functions in multiple studies<sup>11,19-23</sup>. In a randomized controlled trial, Keranis *et al.* reported that increasing the intake of antioxidants improved lung function<sup>24</sup>.

Cigarette smoking is the primary cause of COPD as it increases oxidative stress in the lungs and activates inflammatory responses<sup>25</sup>. Notably, one inhalation from a cigarette generates more than 10<sup>15</sup> free radicals and other oxidants<sup>26</sup>.

Antioxidants protect against the damage caused by smoking in multiple ways<sup>3</sup>. For example, as it is water-soluble, vitamin C scavenges free radicals in the cytoplasm. Koike *et al.* reported that vitamin C diminished smoke-induced oxidative stress and corrected emphysematous lungs *in vivo*<sup>27</sup>.

Carotenoids quench singlet oxygen and inhibit lipid peroxidation<sup>3</sup>. In an animal study, the respiratory epithelia of retinol-deficient animals had atrophied ciliated cells and modified lipid contents<sup>28</sup>. The pathologic features of the retinol-deficient animals were similar to those of human smokers<sup>29</sup>.

Smokers exhibit nicotine-induced reductions in intestinal absorption and elevated metabolic turnover<sup>30</sup>. The metabolism or destruction of antioxidant vitamins increases in inflammatory environments<sup>31-34</sup>, which suggests that smokers with COPD require larger amounts of antioxidant vitamins to achieve the same blood levels as non-smokers. A study by Sargeant found that vitamin C may modify the adverse effects of smoking and the risk of COPD in the European population<sup>35</sup>. Additionally, Shin *et al.* reported that Korean smokers with adequate vitamin C intake had acceptable pulmonary functions<sup>36</sup> and Park *et al.* showed that dietary vitamin C provides protection against

1 COPD<sup>37</sup>. Additionally, Morabia *et al.* identified that airway obstruction was reduced by vitamin A in  
2 smokers<sup>11</sup>.

3 One notable finding in the current study was that the effects of antioxidant vitamin intake on lung  
4 function were stronger among male smokers. Additionally, the association between the risk of COPD  
5 and antioxidant vitamin intake was clear for male but not female smokers. Male smokers with lower  
6 antioxidant vitamin intakes had increased ORs of COPD compared to female smokers. Although the  
7 dose-dependent effect on COPD risk was not obvious in vitamin A and carotene, contrary to vitamin  
8 C (Figure 2), male smokers with Q5 intake showed a clearly reduced risk to develop COPD than male  
9 smokers with Q1 intake in all three antioxidant vitamins.

10 After limiting the analysis to subjects with COPD, a significant association between antioxidant  
11 vitamin intake and FEV<sub>1</sub> was observed in male smokers but not in other groups. This finding was  
12 similar to that of Joshi *et al.*, where changes in COPD risk and dietary vitamin C and vitamin E intake  
13 differed between males and females<sup>38</sup>.

14 It is not known how gender differences impact pulmonary functions based on antioxidant vitamin  
15 intake; however, animal studies have revealed gender differences in antioxidant vitamin requirements.  
16 Al Rejaie *et al.* reported gender-related differences in the protective roles of ascorbic acid against  
17 oxidative stress<sup>39</sup>, whereas Jiao *et al.* revealed gender differences in the regulation and expression of  
18 oxidative genes in mice<sup>40</sup>.

19 Studies detailing the effects of antioxidant vitamins on lung function in smokers and non-smokers are  
20 lacking<sup>5,23</sup>. In the US population, Britton *et al.* revealed that the relationship between vitamin C  
21 intake and FEV<sub>1</sub> was stronger in ex-smokers than non- or current smokers<sup>5</sup>. Shahar *et al.* reported a  
22 relationship between individuals in Q1 of vitamin A intake and airway obstruction among individuals  
23 who smoked >41 pack years<sup>23</sup>.

1 Among male COPD patients, those smoking  $\geq 20$  pack years had improved lung functions as  
2 antioxidant vitamin intake increased. These results support that associations between antioxidants and  
3 lung function may differ according to smoking status in COPD patients. However, it is unknown what  
4 causes such differences. One hypothesis is that the efficacy of antioxidant vitamins is proportional to  
5 the level of oxidant burden in COPD. Additional studies are required to determine whether the  
6 benefits of antioxidant vitamins depend on the smoking duration or dose in COPD patients.

7 This study has several limitations that should be noted. As we used a cross-sectional design, the data  
8 cannot be used to answer questions regarding causation. Additionally, because data on nutritional  
9 intake were obtained by 24-hour recall, inaccurate responses may have been offered. This study used  
10 the pre-bronchodilator FEV<sub>1</sub> for determining COPD; however, the definition of COPD is based on  
11 post-bronchodilator FEV<sub>1</sub><sup>15</sup>. This study failed to obtain data regarding air pollution or occupational  
12 exposure and, therefore, could not associate these variables with lung function; however, the strength  
13 of this study is that these data represent the Korean population.

## 14 **Conclusion**

15 This study supports that antioxidant vitamins have beneficial effects on pulmonary function in the  
16 Korean population. The data indicate that there is a stronger association between antioxidant vitamin  
17 intake and the risk of COPD in male smokers. The beneficial effects of antioxidant vitamins in COPD  
18 patients differed by gender and smoking status, and future investigations should determine the roles of  
19 dietary antioxidant vitamins in specific groups.

## 21 **Contributors**

22 JYH and YSK equally contributed to the conception and design of the research; YSK contributed to  
23 the design of the research; CYL contributed to the acquisition and analysis of the data; MGL and

1  
2  
3  
4  
5  
6  
7  
8  
9  
10  
11  
12  
13  
14  
15  
16  
17  
18  
19  
20  
21  
22  
23  
24  
25  
26  
27  
28  
29  
30  
31  
32  
33  
34  
35  
36  
37  
38  
39  
40  
41  
42  
43  
44  
45  
46  
47  
48  
49  
50  
51  
52  
53  
54  
55  
56  
57  
58  
59  
60

1 YSK contributed to the interpretation of the data; and JYH drafted the manuscript. All authors  
2 critically revised the manuscript, agree to be fully accountable for ensuring the integrity and accuracy  
3 of the work, and read and approved the final manuscript.

#### 4 **Conflict of Interest Statement**

6 The authors declare no conflict of interest.

#### 8 **Funding**

9 This research was supported by the Bio & Medical Technology Development Program of the National  
10 Research Foundation (NRF) & funded by the Korean government (MSIT) (NRF-  
11 2017M3A9E8033225). This work was supported by the National Research Foundation of Korea  
12 Grant funded by Korean Government (NRF 2017R1C1B5017879).

#### 14 **Competing interests**

15 None declared

#### 17 **Provenance and peer review**

18 Not commissioned; externally peer reviewed

#### 20 **Data sharing statement**

21 No additional data are available.

22

## References

1. Viegi G, Pistelli F, Sherrill DL, et al. Definition, epidemiology and natural history of COPD. *The European respiratory journal* 2007;30(5):993-1013. doi: 10.1183/09031936.00082507
2. Capocaccia R, Verdecchia A, Micheli A, et al. Breast cancer incidence and prevalence estimated from survival and mortality. *Cancer Causes Control* 1990;1(1):23-9.
3. Northrop-Clewes CA, Thurnham DI. Monitoring micronutrients in cigarette smokers. *Clin Chim Acta* 2007;377(1-2):14-38. doi: 10.1016/j.cca.2006.08.028
4. Kan H, Stevens J, Heiss G, et al. Dietary fiber, lung function, and chronic obstructive pulmonary disease in the atherosclerosis risk in communities study. *Am J Epidemiol* 2008;167(5):570-8. doi: 10.1093/aje/kwm343 [published Online First: 2007/12/08]
5. Britton JR, Pavord ID, Richards KA, et al. Dietary antioxidant vitamin intake and lung function in the general population. *Am J Respir Crit Care Med* 1995;151(5):1383-7. doi: 10.1164/ajrccm.151.5.7735589 [published Online First: 1995/05/01]
6. Schunemann HJ, Freudenheim JL, Grant BJ. Epidemiologic evidence linking antioxidant vitamins to pulmonary function and airway obstruction. *Epidemiol Rev* 2001;23(2):248-67. [published Online First: 2002/08/24]
7. Ford ES, Li C, Cunningham TJ, et al. Associations between antioxidants and all-cause mortality among US adults with obstructive lung function. *Br J Nutr* 2014;112(10):1662-73. doi: 10.1017/S0007114514002669 [published Online First: 2014/10/16]
8. Rodriguez-Rodriguez E, Ortega RM, Andres P, et al. Antioxidant status in a group of institutionalised elderly people with chronic obstructive pulmonary disease. *Br J Nutr* 2016;115(10):1740-7. doi: 10.1017/S0007114516000878 [published Online First: 2016/03/24]

- 1  
2  
3  
4 1 9. Wu TC, Huang YC, Hsu SY, et al. Vitamin E and vitamin C supplementation in patients  
5  
6 2 with chronic obstructive pulmonary disease. *Int J Vitam Nutr Res* 2007;77(4):272-9. do  
7  
8 3 i: 10.1024/0300-9831.77.4.272 [published Online First: 2008/02/15]  
9  
10 4 10. Heart Protection Study Collaborative G. MRC/BHF Heart Protection Study of antioxidant  
11  
12 5 vitamin supplementation in 20,536 high-risk individuals: a randomised placebo-controlle  
13  
14 6 d trial. *Lancet* 2002;360(9326):23-33. doi: 10.1016/S0140-6736(02)09328-5 [published  
15  
16 7 Online First: 2002/07/13]  
17  
18 8 11. Morabia A, Sorenson A, Kumanyika SK, et al. Vitamin A, cigarette smoking, and airway  
19  
20 9 obstruction. *Am Rev Respir Dis* 1989;140(5):1312-6. doi: 10.1164/ajrccm/140.5.1312  
21  
22 10 12. Hu G, Cassano PA. Antioxidant nutrients and pulmonary function: the Third National Hea  
23  
24 11 lth and Nutrition Examination Survey (NHANES III). *Am J Epidemiol* 2000;151(10):97  
25  
26 12 5-81.  
27  
28 13 13. Miller MR, Hankinson J, Brusasco V, et al. Standardisation of spirometry. *The European*  
29  
30 14 *respiratory journal* 2005;26(2):319-38. doi: 10.1183/09031936.05.00034805  
31  
32 15 14. Choi JK, Paek D, Lee JO. Normal Predictive Values of Spirometry in Korean Population.  
33  
34 16 *Tuberc Respir Dis* 2005;58(3):230-42. doi: 10.4046/trd.2005.58.3.230  
35  
36 17 15. Rabe KF, Hurd S, Anzueto A, et al. Global strategy for the diagnosis, management, and  
37  
38 18 prevention of chronic obstructive pulmonary disease: GOLD executive summary. *Am J*  
39  
40 19 *Respir Crit Care Med* 2007;176(6):532-55. doi: 10.1164/rccm.200703-456SO  
41  
42 20 16. RRD I. Food Composition Table. 7th ed. ed. Suwon,Korea: Rural Resource Development  
43  
44 21 Institute 2006.  
45  
46 22 17. Yoo KH, Kim YS, Sheen SS, et al. Prevalence of chronic obstructive pulmonary disease  
47  
48 23 in Korea: the fourth Korean National Health and Nutrition Examination Survey, 2008.  
49  
50 24 *Respirology* 2011;16(4):659-65. doi: 10.1111/j.1440-1843.2011.01951.x [published Onli  
51  
52 25 ne First: 2011/02/24]  
53  
54 26 18. Hong JY, Kim SY, Chung KS, et al. Factors associated with the quality of life of Korea

- 1 n COPD patients as measured by the EQ-5D. *Qual Life Res* 2015;24(10):2549-58. doi:  
2 10.1007/s11136-015-0979-6
- 3 19. Kelly Y, Sacker A, Marmot M. Nutrition and respiratory health in adults: findings from t  
4 he health survey for Scotland. *Eur Respir J* 2003;21(4):664-71.
- 5 20. McKeever TM, Lewis SA, Smit HA, et al. A multivariate analysis of serum nutrient leve  
6 ls and lung function. *Respir Res* 2008;9:67. doi: 10.1186/1465-9921-9-67
- 7 21. Miedema I, Feskens EJ, Heederik D, et al. Dietary determinants of long-term incidence of  
8 chronic nonspecific lung diseases. The Zutphen Study. *Am J Epidemiol* 1993;138(1):3  
9 7-45.
- 10 22. McKeever TM, Scrivener S, Broadfield E, et al. Prospective study of diet and decline in  
11 lung function in a general population. *Am J Respir Crit Care Med* 2002;165(9):1299-3  
12 03. doi: 10.1164/rccm.2109030
- 13 23. Shahar E, Folsom AR, Melnick SL, et al. Does dietary vitamin A protect against airway  
14 obstruction? The Atherosclerosis Risk in Communities (ARIC) Study Investigators. *Am*  
15 *J Respir Crit Care Med* 1994;150(4):978-82. doi: 10.1164/ajrccm.150.4.7921473
- 16 24. Keranis E, Makris D, Rodopoulou P, et al. Impact of dietary shift to higher-antioxidant f  
17 oods in COPD: a randomised trial. *Eur Respir J* 2010;36(4):774-80. doi: 10.1183/0903  
18 1936.00113809
- 19 25. Alberg AJ, Chen JC, Zhao H, et al. Household exposure to passive cigarette smoking and  
20 serum micronutrient concentrations. *Am J Clin Nutr* 2000;72(6):1576-82.
- 21 26. Pryor WA, Stone K. Oxidants in cigarette smoke. Radicals, hydrogen peroxide, peroxy nitr  
22 ate, and peroxy nitrite. *Ann N Y Acad Sci* 1993;686:12-27; discussion 27-8.
- 23 27. Koike K, Ishigami A, Sato Y, et al. Vitamin C prevents cigarette smoke-induced pulmona  
24 ry emphysema in mice and provides pulmonary restoration. *American journal of respir*  
25 *atory cell and molecular biology* 2014;50(2):347-57. doi: 10.1165/rcmb.2013-0121OC
- 26 28. Iakovleva OA, Pentiuk AA, Gutsol VI, et al. [Effect of vitamin A deficiency on surfactan

- 1  
2  
3  
4 1 ts and enzymes of xenobiotic metabolism in the rat lung]. *Vopr Pitan* 1987(4):61-3.
- 5  
6 2 29. Nettesheim P, Snyder C, Kim JC. Vitamin A and the susceptibility of respiratory tract tis  
7  
8 3  
9  
10 4 30. Kallner AB, Hartmann D, Hornig DH. On the requirements of ascorbic acid in man: stea  
11  
12 5  
13  
14 6 31. Lykkesfeldt J, Loft S, Nielsen JB, et al. Ascorbic acid and dehydroascorbic acid as biom  
15  
16 7  
17  
18 8 32. Cser MA, Majchrzak D, Rust P, et al. Serum carotenoid and retinol levels during childho  
19  
20 9  
21  
22 10 33. Thurnham DI, McCabe GP, Northrop-Clewes CA, et al. Effects of subclinical infection on  
23  
24 11  
25  
26 12  
27  
28 13 34. Pelletier O. Smoking and vitamin C levels in humans. *Am J Clin Nutr* 1968;21(11):1259-  
29  
30 14  
31  
32 15 35. Sargeant LA, Jaeckel A, Wareham NJ. Interaction of vitamin C with the relation between  
33  
34 16  
35  
36 17  
37  
38 18 36. Shin JY, Shim JY, Lee DC, et al. Smokers With Adequate Vitamin C Intake Show a Pr  
39  
40 19  
41  
42 20  
43  
44 21 37. Park HJ, Byun MK, Kim HJ, et al. Dietary vitamin C intake protects against COPD: the  
45  
46 22  
47  
48 23  
49  
50 24  
51  
52 25 38. Joshi P, Kim WJ, Lee SA. The effect of dietary antioxidant on the COPD risk: the com  
53  
54 26  
55  
56  
57  
58  
59  
60



- 1 ;10:2159-68. doi: 10.2147/COPD.S91877
- 2 39. Al-Rejaie SS, Abuohashish HM, Alkhamees OA, et al. Gender difference following high  
3 cholesterol diet induced renal injury and the protective role of rutin and ascorbic acid  
4 combination in Wistar albino rats. *Lipids Health Dis* 2012;11:41. doi: 10.1186/1476-5  
5 11X-11-41
- 6 40. Jiao Y, Chen H, Yan J, et al. Genome-wide gene expression profiles in antioxidant pathw  
7 ays and their potential sex differences and connections to vitamin C in mice. *Int J M  
8 ol Sci* 2013;14(5):10042-62. doi: 10.3390/ijms140510042
- 9  
10  
11  
12  
13  
14  
15  
16  
17  
18  
19  
20  
21  
22  
23  
24  
25  
26  
27  
28  
29  
30  
31  
32  
33  
34  
35  
36  
37  
38  
39  
40  
41  
42  
43  
44  
45  
46  
47  
48  
49  
50  
51  
52  
53  
54  
55  
56  
57  
58  
59  
60

1  
2  
3  
4 **1 Table legends**

5  
6 2

7  
8 **3 Table 1. Study population characteristics.**

9  
10  
11 4 ¶, numbers represent mean percentages (standard deviation).

12  
13  
14 5

15  
16  
17 **6 Table 2. Mean values of adjusted lung function measurements across quintiles of vitamin A,**  
18 **7 carotene, and vitamin C intake.**

19  
20  
21 8 Data were adjusted for age, sex, body mass index, energy intake, number of comorbid diseases,  
22  
23 9 alcohol consumption, place of residence, smoking history, pack years (smoking amount), household  
24  
25 10 income, and education level.

26  
27  
28 11 *P* values were determined using tests for linear trends across increasing quintiles (means) of  
29  
30 12 antioxidant vitamin intake.

31  
32  
33 13

34  
35  
36 **14 Table 3. Association between vitamin A, carotene, and vitamin C intake and COPD according to**  
37 **15 gender and smoking status.**

38  
39  
40 16 OR was determined following adjustment for age, body mass index, energy intake, number of  
41  
42 17 comorbid diseases, alcohol consumption, place of residence, household income, and education level.

43  
44  
45 18 ¶, The risk for COPD was significantly different between Q1 and Q5.

46  
47  
48 19

49  
50  
51 20

1

2 **Table 1. Study population characteristics**

|                                        | Total<br>(n=21,148) | Male smokers<br>(n=7,178) | Male non-smokers<br>(n=1,626) | Female smokers<br>(n=808) | Female non-smokers<br>(n=11,536) | P value |
|----------------------------------------|---------------------|---------------------------|-------------------------------|---------------------------|----------------------------------|---------|
| Age <sup>‡</sup>                       | 57.4 (10.9)         | 57.8 (11.0)               | 57.9 (11.3)                   | 57.4 (12.5)               | 57.1 (10.8)                      | <0.001  |
| 40–49                                  | 6048 (28.6)         | 1998 (27.8)               | 464 (28.5)                    | 273 (33.8)                | 3313 (28.7)                      | <0.001  |
| 50–59                                  | 6131 (29.0)         | 1981 (27.6)               | 431 (26.5)                    | 199 (24.6)                | 3520 (30.5)                      |         |
| 60–69                                  | 5387 (25.5)         | 1913 (26.7)               | 430 (26.4)                    | 158 (19.6)                | 2866 (25.0)                      |         |
| 70–                                    | 3582 (16.9)         | 1286 (17.9)               | 301 (18.5)                    | 178 (22.0)                | 1817 (15.8)                      |         |
| BMI <sup>‡</sup>                       | 24.2 (3.0)          | 24.2 (2.8)                | 24.3 (2.8)                    | 23.8 (3.6)                | 24.2 (3.2)                       | 0.007   |
| Education                              |                     |                           |                               |                           |                                  | <0.001  |
| Elementary                             | 7229 (34.2)         | 1763 (24.6)               | 321 (19.7)                    | 381 (47.2)                | 4764 (41.3)                      |         |
| Middle school                          | 3315 (15.7)         | 1216 (16.9)               | 267 (16.4)                    | 112 (13.9)                | 1720 (14.9)                      |         |
| High school                            | 6427 (30.4)         | 2366 (33.0)               | 458 (28.2)                    | 228 (28.2)                | 3375 (29.3)                      |         |
| More than college                      | 4169 (19.7)         | 1831 (25.5)               | 580 (35.7)                    | 87 (10.8)                 | 1671 (14.5)                      |         |
| Household income                       |                     |                           |                               |                           |                                  | <0.001  |
| 1st quartile                           | 4763 (22.5)         | 1440 (20.1)               | 289 (17.8)                    | 315 (39.0)                | 2719 (23.6)                      |         |
| 2nd quartile                           | 5427 (25.7)         | 1874 (26.1)               | 391 (24.1)                    | 223 (27.6)                | 2939 (25.5)                      |         |
| 3rd quartile                           | 5162 (24.4)         | 1869 (26.1)               | 414 (25.5)                    | 145 (17.9)                | 2734 (23.7)                      |         |
| 4th quartile                           | 5780 (27.3)         | 1988 (27.7)               | 530 (32.6)                    | 125 (15.5)                | 3137 (27.2)                      |         |
| Comorbidity <sup>‡</sup>               | 0.9 (1.1)           | 0.9 (1.0)                 | 0.8 (0.9)                     | 1.0 (1.2)                 | 1.0 (1.1)                        | <0.001  |
| Pack years <sup>‡</sup>                | 4.7 (13.6)          | 13.3 (20.3)               | 0.2 (2.2)                     | 3.3 (11.9)                | 0.0 (0.0)                        | <0.001  |
| Alcohol                                | 17554 (83.0)        | 6877 (95.8)               | 1399 (86.0)                   | 714 (88.4)                | 8564 (74.2)                      | <0.001  |
| Energy intake (Kcal/day) <sup>‡</sup>  | 1901.5 (797.8)      | 2266.5 (869.7)            | 2212.6 (855.9)                | 1538.2 (653.4)            | 1656.0 (630.0)                   | <0.001  |
| Vitamin A (µg RE/day) <sup>‡</sup>     | 822.5 (1118.5)      | 881.9 (1067.5)            | 925.5 (1095.2)                | 600.3 (644.2)             | 786.6 (1173.9)                   | <0.001  |
| Carotene (µg/day) <sup>‡</sup>         | 4337.3 (6206.0)     | 4596.2 (5557.8)           | 4803.8 (5506.6)               | 3143.5 (3682.6)           | 4194.1(6780.6)                   | <0.001  |
| Vitamin C (mg/day) <sup>‡</sup>        | 111.9 (107.6)       | 111.8 (97.9)              | 128.8 (107.1)                 | 84.8 (96.9)               | 111.5 (113.5)                    | <0.001  |
| FEV <sub>1</sub> (ml) <sup>‡</sup>     | 2.60 (0.67)         | 3.02 (0.68)               | 3.09 (0.66)                   | 2.23 (0.56)               | 2.30 (0.46)                      | <0.001  |
| FVC (ml) <sup>‡</sup>                  | 3.38 (0.84)         | 4.07 (0.72)               | 4.04 (0.73)                   | 2.88 (0.62)               | 2.89 (0.51)                      | <0.001  |
| FEV <sub>1</sub> /FVC (%) <sup>‡</sup> | 77.3 (7.9)          | 73.9 (9.1)                | 76.6 (7.9)                    | 77.2 (8.0)                | 79.5 (6.1)                       | <0.001  |
| COPD                                   | 3,005 (14.2)        | 1893 (26.4)               | 256 (15.7)                    | 119 (14.7)                | 737 (6.4)                        | <0.001  |

3 <sup>‡</sup>, numbers represent mean percentages (standard deviation).

4

5

1

2 **Table 2. Mean values of adjusted lung function measurements across quintiles of**  
 3 **vitamin A, carotene, and vitamin C intake.**

|                                | Q1    | Q2     | Q3     | Q4     | Q5      | Difference between Q5 and Q1 (95% CI) | <i>P</i> value for trend |
|--------------------------------|-------|--------|--------|--------|---------|---------------------------------------|--------------------------|
| <b>Vitamin A</b>               |       |        |        |        |         |                                       |                          |
| Mean intake ( $\mu$ g RE)      | 151.2 | 353.6  | 573.1  | 893.9  | 2140.8  |                                       |                          |
| FEV <sub>1</sub> (ml)          | 2379  | 2389   | 2410   | 2397   | 2409    | 30 (10,50)                            | 0.008                    |
| FVC(ml)                        | 3119  | 3136   | 3158   | 3148   | 3152    | 33 (10,57)                            | 0.007                    |
| Predicted FEV <sub>1</sub> (%) | 91.37 | 91.44  | 91.91  | 91.45  | 91.94   | 0.57 (-0.08,1.22)                     | 0.185                    |
| Predicted FVC (%)              | 90.93 | 91.06  | 91.45  | 91.22  | 91.48   | 0.55 (0.00,1.10)                      | 0.195                    |
| <b>Carotene</b>                |       |        |        |        |         |                                       |                          |
| Mean intake ( $\mu$ g)         | 691.1 | 1747.4 | 2938.9 | 4736.1 | 11574.1 |                                       |                          |
| FEV <sub>1</sub> (ml)          | 2347  | 2363   | 2376   | 2370   | 2379    | 32 (12,52)                            | 0.010                    |
| FVC (ml)                       | 3088  | 3117   | 3127   | 3119   | 3124    | 36(13.59)                             | 0.005                    |
| Predicted FEV <sub>1</sub> (%) | 91.55 | 92.03  | 92.26  | 91.85  | 92.31   | 0.76 (0.12,1.39)                      | 0.096                    |
| Predicted FVC (%)              | 91.02 | 91.68  | 91.78  | 91.41  | 91.82   | 0.80 (0.26,1.33)                      | 0.015                    |
| <b>Vitamin C</b>               |       |        |        |        |         |                                       |                          |
| Mean intake (mg)               | 24.2  | 53.6   | 84.2   | 128.8  | 268.9   |                                       |                          |
| FEV <sub>1</sub> (ml)          | 2411  | 2423   | 2436   | 2441   | 2453    | 36 (16.56)                            | <0.001                   |
| FVC (ml)                       | 3117  | 3122   | 3132   | 3140   | 3154    | 35 (12.58)                            | 0.014                    |
| Predicted FEV <sub>1</sub> (%) | 91.3  | 91.5   | 91.9   | 91.99  | 92.21   | 0.91 (0.27,1.55)                      | 0.050                    |
| Predicted FVC (%)              | 91.29 | 91.33  | 91.58  | 91.77  | 92.0    | 0.71 (0.17,1.26)                      | 0.118                    |

4

5 Data were adjusted for age, sex, body mass index, energy intake, number of comorbid diseases, alcohol  
 6 consumption, place of residence smoking history, pack years (smoking amount), household income, and  
 7 education level. *P* values were determined using tests for linear trends across increasing quintiles (means) of  
 8 antioxidant vitamin intake.

9

10

11

**Table 3. Association between vitamin A, carotene, and vitamin C intake and COPD according to gender and smoking status.**

|                    | Intake |      | COPD |     | OR                            |                                | <i>P</i> interaction |
|--------------------|--------|------|------|-----|-------------------------------|--------------------------------|----------------------|
|                    | Q5     | Q1   | Q5   | Q1  | Q5                            | Q1                             |                      |
| <b>Vitamin A</b>   |        |      |      |     |                               |                                |                      |
| Female non-smokers | 2096   | 2564 | 105  | 242 | ref                           | 1.16 (0.89,1.49)               | <0.001               |
| Female smokers     | 109    | 264  | 16   | 53  | 3.90 (2.12,7.17)              | 2.42 (1.63, 3.58)              |                      |
| Male non-smokers   | 394    | 225  | 53   | 47  | 3.26 (2.24,4.75)              | 3.15 (2.10,4.72)               |                      |
| Male smokers       | 1630   | 1176 | 320  | 444 | 5.54 (4.28,7.16) <sup>¶</sup> | 7.60 (5.92, 9.76) <sup>¶</sup> |                      |
| <b>Carotene</b>    |        |      |      |     |                               |                                |                      |
| Female non-smokers | 2118   | 2529 | 108  | 226 | ref                           | 1.10 (0.85,1.42)               | <0.001               |
| Female smokers     | 104    | 268  | 15   | 49  | 3.47 (1.86,6.47)              | 2.16 (1.45, 3.23)              |                      |
| Male non-smokers   | 397    | 243  | 55   | 50  | 3.35 (2.31,4.86)              | 3.24 (2.18,4.82)               |                      |
| Male smokers       | 1610   | 1189 | 321  | 425 | 5.83 (4.51,7.53) <sup>¶</sup> | 7.16 (5.58, 9.19) <sup>¶</sup> |                      |
| <b>Vitamin C</b>   |        |      |      |     |                               |                                |                      |
| Female non-smokers | 2303   | 2466 | 112  | 465 | ref                           | 1.00 (0.77,1.30)               | <0.001               |
| Female smokers     | 107    | 294  | 12   | 35  | 2.37 (1.20,4.71)              | 2.27 (1.55, 3.34)              |                      |
| Male non-smokers   | 401    | 191  | 55   | 55  | 3.28 (2.27,4.73)              | 3.24 (2.07, 5.06)              |                      |
| Male smokers       | 1419   | 1278 | 317  | 204 | 6.20 (4.82,7.98) <sup>¶</sup> | 7.79 (6.12, 9.92) <sup>¶</sup> |                      |

OR (Odd ratio) was determined following adjustment for age, body mass index, energy intake, number of comorbid diseases, alcohol consumption, place of residence, household income, and education level.

<sup>¶</sup>, The risk for COPD was significantly different between Q1 and Q5.

1  
2  
3  
4 **1 Figure Legends**

5  
6 **2 Figure 1. The study population framework**

7  
8  
9 **3**

10  
11  
12 **4 Figure 2. Odds ratios for the association between antioxidant vitamin intake and COPD among**  
13  
14 **5 (a) male and (b) female smokers and non-smokers.**

15  
16  
17 Odds ratios were adjusted for age, body mass index, energy intake, number of comorbid diseases,  
18  
19 alcohol consumption, place of residence, household income, and education level.

20  
21  
22 **8**

23  
24 **9 Figure 3. Mean values of adjusted forced expiratory volume in 1-second (FEV<sub>1</sub>) measurements**  
25  
26 **10 across quintiles of vitamin A, carotene, and vitamin C intake (energy-adjusted) in subjects with**  
27  
28 **11 COPD.**

29  
30  
31 Adjusted for age, body mass index, energy intake, number of comorbid diseases, alcohol consumption,  
32  
33 place of residence, household income, and education level. *P* values were determined using tests for  
34  
35 linear trends across increasing quintiles (means) of antioxidant vitamin intake.

36  
37  
38 **15**

39  
40  
41 **16 Figure 4. Mean values of adjusted forced expiratory volume in 1-second (FEV<sub>1</sub>) measurements**  
42  
43 **17 across quintiles of vitamin A, carotene, and vitamin C intake (energy-adjusted) in male COPD**  
44  
45 **18 patients according to smoking status.**

46  
47 Values were adjusted for age, body mass index, energy intake, number of comorbid diseases, alcohol  
48  
49 consumption, place of residence, household income, and education level. *P*-values were determined  
50  
51 using tests for linear trends across increasing quintiles (median) of antioxidant vitamin intake.

52  
53  
54  
55  
56  
57  
58  
59  
60

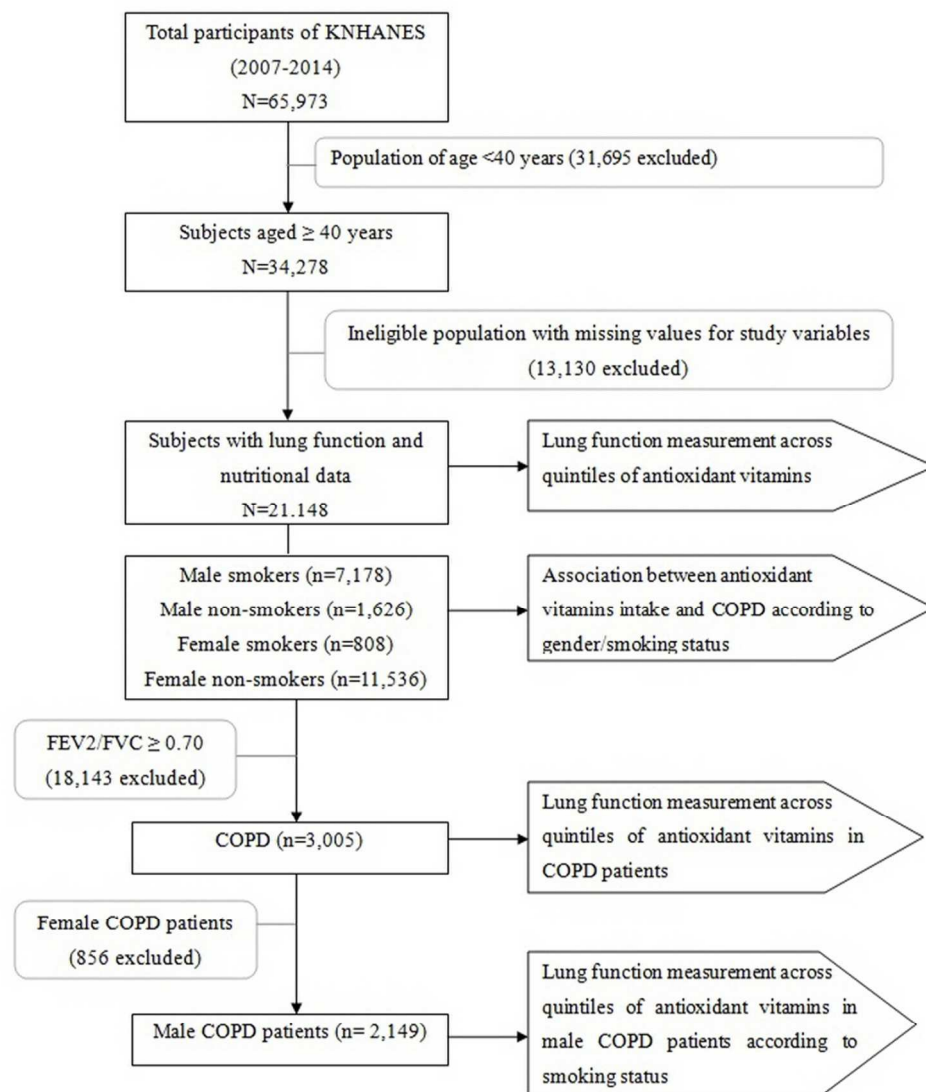

Figure 1. The study population framework

240x274mm (300 x 300 DPI)

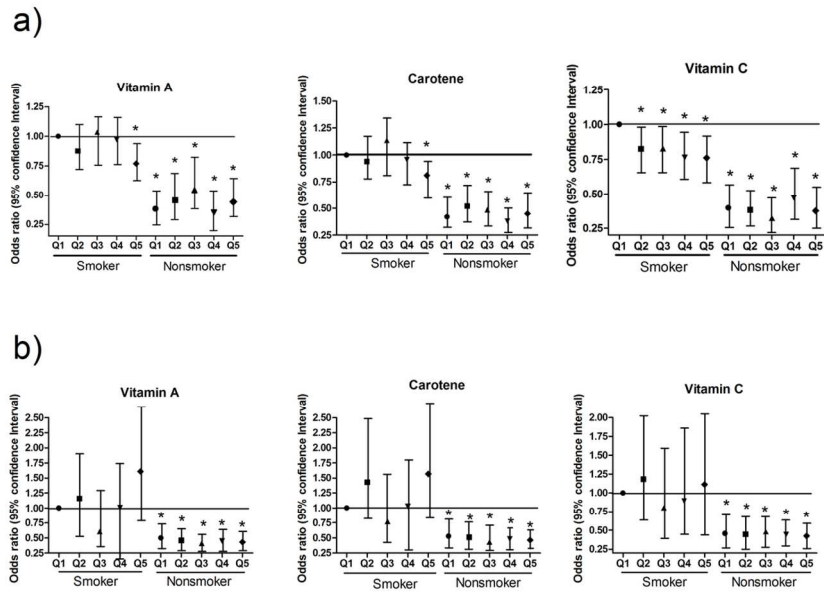

Figure 2. Odds ratios for the association between antioxidant vitamin intake and COPD among (a) male and (b) female smokers and non-smokers

122x77mm (300 x 300 DPI)



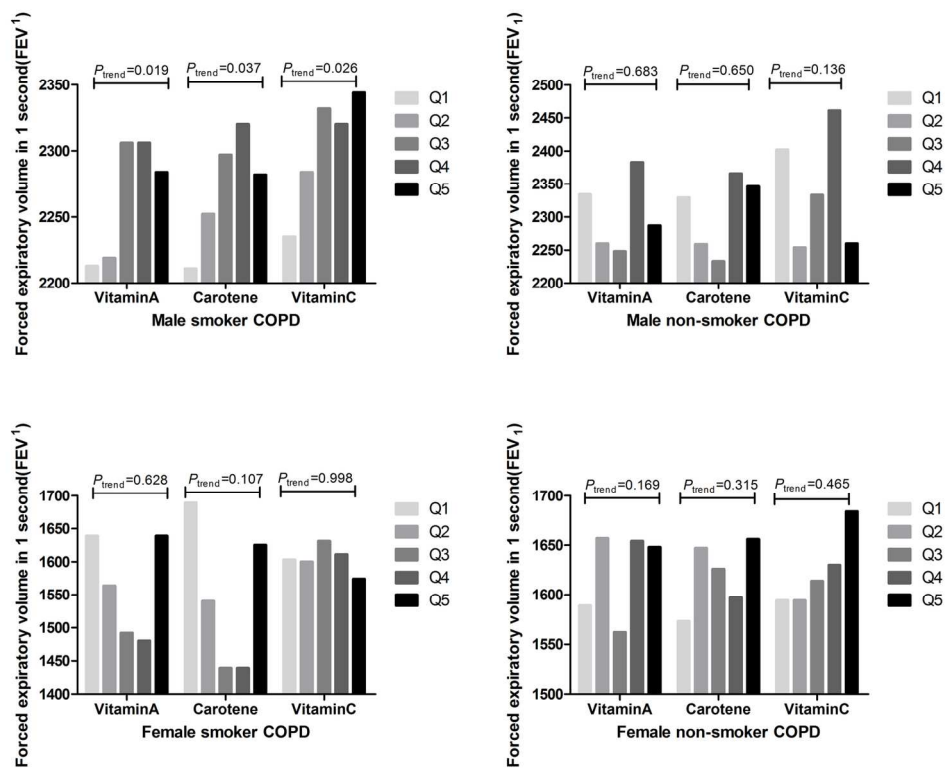

Figure 3. Mean values of adjusted forced expiratory volume in 1-second (FEV<sub>1</sub>) measurements across quintiles of vitamin A, carotene, and vitamin C intake (energy-adjusted) in subjects with COPD.

148x121mm (300 x 300 DPI)

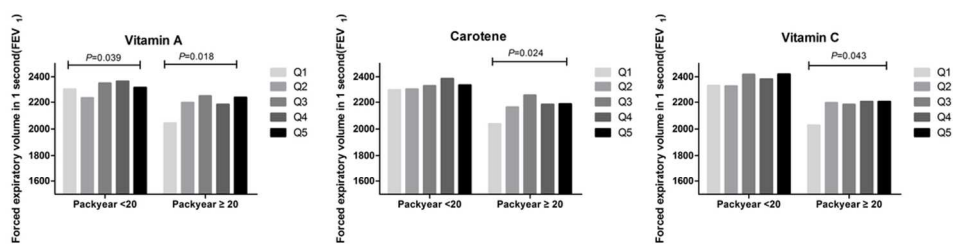

Figure 4. Mean values of adjusted forced expiratory volume in 1-second (FEV1) measurements across quintiles of vitamin A, carotene, and vitamin C intake (energy-adjusted) in male COPD patients according to smoking status.

50x14mm (600 x 600 DPI)

**STROBE 2007 (v4) Statement—Checklist of items that should be included in reports of *cross-sectional studies***

| Section/Topic                | Item # | Recommendation                                                                                                                                                                       | Reported on page # |
|------------------------------|--------|--------------------------------------------------------------------------------------------------------------------------------------------------------------------------------------|--------------------|
| Title and abstract           | 1      | (a) Indicate the study's design with a commonly used term in the title or the abstract                                                                                               | 1                  |
|                              |        | (b) Provide in the abstract an informative and balanced summary of what was done and what was found                                                                                  | 2                  |
| <b>Introduction</b>          |        |                                                                                                                                                                                      |                    |
| Background/rationale         | 2      | Explain the scientific background and rationale for the investigation being reported                                                                                                 | 4                  |
| Objectives                   | 3      | State specific objectives, including any prespecified hypotheses                                                                                                                     | 4                  |
| <b>Methods</b>               |        |                                                                                                                                                                                      |                    |
| Study design                 | 4      | Present key elements of study design early in the paper                                                                                                                              | 5                  |
| Setting                      | 5      | Describe the setting, locations, and relevant dates, including periods of recruitment, exposure, follow-up, and data collection                                                      | 5                  |
| Participants                 | 6      | (a) Give the eligibility criteria, and the sources and methods of selection of participants                                                                                          | 5                  |
| Variables                    | 7      | Clearly define all outcomes, exposures, predictors, potential confounders, and effect modifiers. Give diagnostic criteria, if applicable                                             | 6                  |
| Data sources/<br>measurement | 8*     | For each variable of interest, give sources of data and details of methods of assessment (measurement). Describe comparability of assessment methods if there is more than one group | 6-7                |
| Bias                         | 9      | Describe any efforts to address potential sources of bias                                                                                                                            | 7                  |
| Study size                   | 10     | Explain how the study size was arrived at                                                                                                                                            | 7                  |
| Quantitative variables       | 11     | Explain how quantitative variables were handled in the analyses. If applicable, describe which groupings were chosen and why                                                         | 7                  |
| Statistical methods          | 12     | (a) Describe all statistical methods, including those used to control for confounding                                                                                                | 7                  |
|                              |        | (b) Describe any methods used to examine subgroups and interactions                                                                                                                  | 7                  |
|                              |        | (c) Explain how missing data were addressed                                                                                                                                          | 7                  |
|                              |        | (d) If applicable, describe analytical methods taking account of sampling strategy                                                                                                   | 7                  |
|                              |        | (e) Describe any sensitivity analyses                                                                                                                                                | 7                  |
| <b>Results</b>               |        |                                                                                                                                                                                      |                    |

|                          |     |                                                                                                                                                                                                              |         |
|--------------------------|-----|--------------------------------------------------------------------------------------------------------------------------------------------------------------------------------------------------------------|---------|
| Participants             | 13* | (a) Report numbers of individuals at each stage of study—eg numbers potentially eligible, examined for eligibility, confirmed eligible, included in the study, completing follow-up, and analysed            | 9       |
|                          |     | (b) Give reasons for non-participation at each stage                                                                                                                                                         | Figure1 |
|                          |     | (c) Consider use of a flow diagram                                                                                                                                                                           | Figure1 |
| Descriptive data         | 14* | (a) Give characteristics of study participants (eg demographic, clinical, social) and information on exposures and potential confounders                                                                     | 9       |
|                          |     | (b) Indicate number of participants with missing data for each variable of interest                                                                                                                          | 9       |
| Outcome data             | 15* | Report numbers of outcome events or summary measures                                                                                                                                                         | 10-11   |
| Main results             | 16  | (a) Give unadjusted estimates and, if applicable, confounder-adjusted estimates and their precision (eg, 95% confidence interval). Make clear which confounders were adjusted for and why they were included | 9-11    |
|                          |     | (b) Report category boundaries when continuous variables were categorized                                                                                                                                    | 9-11    |
|                          |     | (c) If relevant, consider translating estimates of relative risk into absolute risk for a meaningful time period                                                                                             | 9-11    |
| Other analyses           | 17  | Report other analyses done—eg analyses of subgroups and interactions, and sensitivity analyses                                                                                                               | 9-11    |
| <b>Discussion</b>        |     |                                                                                                                                                                                                              |         |
| Key results              | 18  | Summarise key results with reference to study objectives                                                                                                                                                     | 12      |
| Limitations              | 19  | Discuss limitations of the study, taking into account sources of potential bias or imprecision. Discuss both direction and magnitude of any potential bias                                                   | 14      |
| Interpretation           | 20  | Give a cautious overall interpretation of results considering objectives, limitations, multiplicity of analyses, results from similar studies, and other relevant evidence                                   | 12-14   |
| Generalisability         | 21  | Discuss the generalisability (external validity) of the study results                                                                                                                                        | 12-14   |
| <b>Other information</b> |     |                                                                                                                                                                                                              |         |
| Funding                  | 22  | Give the source of funding and the role of the funders for the present study and, if applicable, for the original study on which the present article is based                                                | 15      |

\*Give information separately for cases and controls in case-control studies and, if applicable, for exposed and unexposed groups in cohort and cross-sectional studies.

**Note:** An Explanation and Elaboration article discusses each checklist item and gives methodological background and published examples of transparent reporting. The STROBE checklist is best used in conjunction with this article (freely available on the Web sites of PLoS Medicine at <http://www.plosmedicine.org/>, Annals of Internal Medicine at <http://www.annals.org/>, and Epidemiology at <http://www.epidem.com/>). Information on the STROBE Initiative is available at [www.strobe-statement.org](http://www.strobe-statement.org).
